# Supplementary material
Source: HighWire-hosted journal article supplement (https://bmjopen.bmj.com/content/12/3/e058921)
Supplement: inline-supplementary-material-1 [file inline-supplementary-material-1.pdf]

## Supplementary Material

### . A systematic review of diagnostic and prognostic models of Chronic kidney disease in Low- and Middle- Income Countries

|                                                                                                                                                    |    |
|----------------------------------------------------------------------------------------------------------------------------------------------------|----|
| <b>S1 Text: Protocol (also available at <a href="https://doi.org/10.1101/2021.04.24.21256041">https://doi.org/10.1101/2021.04.24.21256041</a>)</b> | 1  |
| <b>S1 Table: PRISMA Checklist</b>                                                                                                                  | 6  |
| <b>S2 Table: Search terms</b>                                                                                                                      | 11 |
| <b>S2.1 Table: Embase, Medline and Global Health (OVID)</b>                                                                                        | 11 |
| <b>S2.2 Table: SCOPUS</b>                                                                                                                          | 12 |
| <b>S2.3 Table: WEB OF SCIENCE</b>                                                                                                                  | 14 |
| <b>S3 Table: Data extraction form (by chapters)</b>                                                                                                | 15 |
| <b>S3.1 Table: Source of data and participants</b>                                                                                                 | 15 |
| <b>S3.2 Table:: Outcome</b>                                                                                                                        | 26 |
| <b>S3.3 Table: Candidate predictors</b>                                                                                                            | 31 |
| <b>S3.4 Table: Sample size and missing data</b>                                                                                                    | 44 |
| <b>S3.5 Table: Model development</b>                                                                                                               | 46 |
| <b>S3.6 Table: Model performance</b>                                                                                                               | 49 |
| <b>S3.7 Table: Results</b>                                                                                                                         | 53 |
| <b>S3.8 Table: Discussion</b>                                                                                                                      | 55 |
| <b>S4 Table: PROBAST</b>                                                                                                                           | 57 |
| <b>S4.1 Table: Risk of Bias (RoB)</b>                                                                                                              | 57 |
| <b>S4.2 Table: Applicability</b>                                                                                                                   | 65 |
| <b>S1 Figure: Countries where studies were conducted.</b>                                                                                          | 67 |
| <b>S2 Figure: Predictors included in the final models.</b>                                                                                         | 68 |

**S1 Text: Protocol (also available at <https://doi.org/10.1101/2021.04.24.21256041>)****Chronic Kidney Disease in Low- and Middle- Income Countries: Protocol for a  
systematic review of diagnostic and prognostic models**

Edson J Ascencio<sup>1,2</sup>

Diego J Aparcana-Granda<sup>1,3</sup>

Rodrigo M Carrillo-Larco<sup>3,4</sup>

1. Facultad de Medicina Alberto Hurtado, Universidad Peruana Cayetano Heredia, Lima, Perú.
2. Emerge, Emerging Diseases and Climate Change Research Unit, School of Public Health and Administration, Universidad Peruana Cayetano Heredia, Lima, Peru
3. CRONICAS Centre of Excellence in Chronic Diseases, Universidad Peruana Cayetano Heredia, Lima, Peru
4. Department of Epidemiology and Biostatistics, School of Public Health, Imperial College London, London, UK

**Corresponding author**

Rodrigo M Carrillo-Larco, MD

Department of Epidemiology and Biostatistics

School of Public Health, Imperial College London, London W2 1PG, UK

E-mail: [rcarrill@ic.ac.uk](mailto:rcarrill@ic.ac.uk)

Phone: +44 0 7578240395

**Competing interests:** The authors declare no conflict of interests.

**Support:** RMC-L is supported by a Wellcome Trust International Training Fellowship (214185/Z/18/Z).

**ABSTRACT**

**Background:** Chronic Kidney Disease (CKD) is a highly prevalent condition with a large disease burden globally. In low- and middle-income countries (LMIC) the CKD screening challenges the health system. This systematic and comprehensive search of all CKD diagnostic and prognostic models in LMIC will inform screening strategies in LMIC following a risk-based approach.

**Objective:** To summarize all multivariate diagnostic and prognostic models for CKD in adults in LMIC.

**Methods:** Systematic review. Without date or language restrictions we will search Embase, Medline, Global Health (these three through Ovid), SCOPUS and Web of Science. We seek multivariable diagnostic or prognostic models which included a random sample of the general population. We will screen titles and abstracts; we will then study the selected reports. Both phases will be done by two reviewers independently. Data extraction will be performed by two researchers independently using a pre-specified Excel form (CHARMS model). We will evaluate the risk of bias with the PROBAST tool.

**Conclusion:** This systematic review will provide the most comprehensive list and critical appraisal of diagnostic and prognostic models for CKD available for the general population in LMIC. This evidence could

inform policies and interventions to improve CKD screening in LMIC following a risk-based approach, maximizing limited resources and reaching populations with limited access to CKD screening tests. This systematic review will also reveal methodological limitations and research needs to improve CKD diagnostic and prognostic models in LMIC.

**Keywords:** Chronic Kidney Disease; Diagnostic Models; Prognostic Models; Low- and Middle-income countries.

## INTRODUCTION

Chronic kidney disease (CKD) is a highly prevalent condition that contributes to a large part of disease burden globally. Between 1990 and 2017, the health metrics of CKD showed a bleak profile: mortality rate, incidence and kidney transplantation rate increased by 2.8%, 29.3% and 34.4%, respectively.<sup>1</sup> CKD led to 1.2 million deaths in 2017 and in the best-case scenario, mortality is projected to increase to 2.2 million deaths<sup>2</sup> and become the 5th cause of years of life lost (YLL) by 2040.<sup>3</sup> Currently, 2.5 million of patients receive kidney transplantation therapy and it is projected to increase to 5.4 million by 2030.<sup>1</sup> CKD also reveals disparities between low- and middle-income countries (LMIC) and high income countries (HIC); for example, the age-standardised disability-adjusted life-year (DALY) rate due to CKD was the highest in LMIC between 1990-2017.<sup>4</sup> In LMIC, that remain as resource-constrained settings, there is a need for optimization of the CKD screening strategies which usually challenge the health system.<sup>5</sup>

Risk equations or risk scores are a cost-effective alternative for CKD screening.<sup>6</sup> These equations are less invasive and accepted by the general population;<sup>7</sup> also, they require less resources like laboratory tests.<sup>8</sup> Many scores were developed in high-income countries,<sup>9-11</sup> and they may not be used in LMIC because their accuracy is better where they have been developed.<sup>12</sup> Current strategies for CKD screening suggest studying people with risk factors (e.g. diabetes, hypertension).<sup>13-15</sup> These recommendations rely on studies where albuminuria and proteinuria were used as screening tools for identifying CKD patients.<sup>16</sup> Nevertheless, a systematic review found that using risk scores allows screening of a larger population and therefore can be useful for detecting more CKD cases.<sup>6</sup>

To date, there are no systematic reviews of diagnostic or prognostic models for CKD with a focus on LMIC.<sup>17, 18</sup> This limits our knowledge of what tools we have to enhance CKD screening in LMIC; similarly, this dearth of evidence prevents from planning future research to overcome the limitations of available models. This will be the first systematic review to fill these knowledge gaps in LMIC to improve and complement the CKD screening programmes in LMIC.

## METHODS

### Objective

To synthesise CKD diagnostic and prognostic models for the adult population of LMIC.

### Study design

This systematic review and meta-analysis will be conducted following the preferred reporting items for systematic reviews and meta-analyses (PRISMA) 2020 guidelines.<sup>19</sup> We will also adhere to the recommendations for systematic reviews of diagnostic and prognostic models following the CHARMS guidelines<sup>20</sup> and the PROBAST tool to assess risk of bias.<sup>21</sup>

### Eligibility criteria

*Participants/population:* We will include the general adult population (18 years and above) of LMIC with no gender restrictions. Studies following a population-based random sampling approach will be included. We will only include populations from LMIC according to The World Bank.<sup>22</sup> Conversely, studies with a study population of only patients (e.g., people with hypertension) or high-risk individuals (e.g., smokers) will be excluded. We will exclude studies with LMIC populations outside a LMIC.

*Intervention, exposure:* None (this review is looking at CKD diagnostic and prognostic models in LMIC).

*Comparator, control:* None (this review is looking at CKD diagnostic and prognostic models in LMIC).

*Outcome:* Diagnostic and prognostic models for CKD. The CKD diagnosis should have been based on a laboratory or imaging test including: urine albumin-creatinine ratio, urine protein-creatinine ratio, albumin excretion ratio, urine sediment, kidney images, kidney biopsy or the estimated glomerular filtration rate (eGFR). In other words, research in which CKD diagnosis was based on self-reported information only will not be considered. However, if a study combined both self-reported information and a laboratory or imaging tests, this will be included.

*Types of studies:* Studies with an observational design will be included, which encompasses cross-sectional (for diagnostic models) and prospective longitudinal studies (for prognostic models). If we retrieve any systematic review on this subject, we will revise its reference list to identify relevant original sources.

### **Literature Search and Data collation**

The search will be conducted in five search engines: Embase, Medline, Global Health (these three through Ovid), SCOPUS and Web of Science. No date or language restrictions will be set. The complete search strategy can be found in Supplementary Material.

Titles and abstracts will be screened by two researchers independently (DJA-G and EJA), looking for studies that meet the selection criteria above detailed. Full-text reports of the selected publications will be studied by two researchers independently (DJA-G and EJA). Discrepancies at any stage will be solved by consensus or by a third party (RMC-L).

During the full-text phase, if there are any original reports in which the population, methodology or results are not clear enough to assess the inclusion/exclusion criteria, we will contact the corresponding author by email. We will wait for two weeks, if we receive no answer and cannot solve our doubts through other means, this report will be excluded based on the lack of clarity to assess inclusion/exclusion criteria.

We will record the reasons for exclusion in the full-text phase and summarize the number of included/excluded reports following the PRISMA flow diagram.

### **Data extraction**

We will develop a data extraction form following the CHARMS recommendations.<sup>20</sup> Data extraction will be conducted by two researchers independently; discrepancies will be solved by consensus or by a third party (RMC-L).

### **Risk of bias of individual studies**

The risk of bias assessment of individual reports will be conducted using the Prediction model Risk Of

Bias ASsessment Tool (PROBAST) tool.<sup>21</sup>

### **Statistical Analysis**

A qualitative synthesis is planned, whereby we will narratively synthesise the findings from the selected studies. We will summarize the key elements from each report such as study design, study population and characteristics of the study population. Also, we will summarize the key features of the risk scores as provided by each report, including discrimination, calibration, sensitivity, specificity, and predictive values. A quantitative synthesis will be carried out if the included studies are found to be sufficiently homogenous and we have at least four original reports.

### **Ethics**

This review did not directly include human subjects. We considered this work as 'low risk' and did not request approval by an Ethics Committee. Results and opinions included in this protocol, and those included in the final report, are the author's alone and do not represent those of the institutions to which they belong.

## CONCLUSIONS

This systematic review will provide a comprehensive list of diagnostic and prognostic models for CKD for people in LMIC, along with their accuracy metrics. Currently, information lacks in LMIC where diagnostic and prognostic models could inform CKD screening strategies. Similarly, this work will elucidate the limitations of available diagnostic and prognostic models for CKD in LMIC, so that future research can be planned accordingly to overcome these caveats and deliver robust models to advance

CKD screening strategies in LMIC.

## REFERENCES

1. Collaboration GBDCKD. Global, regional, and national burden of chronic kidney disease, 1990-2017: a systematic analysis for the Global Burden of Disease Study 2017. *Lancet*. 2020;395(10225):709-33.
2. Agudelo-Botero M, Valdez-Ortiz R, Giraldo-Rodriguez L, Gonzalez-Robledo MC, Mino-Leon D, Rosales-Herrera MF, et al. Overview of the burden of chronic kidney disease in Mexico: secondary data analysis based on the Global Burden of Disease Study 2017. *BMJ Open*. 2020;10(3):e035285.
3. Foreman KJ, Marquez N, Dolgert A, Fukutaki K, Fullman N, McGaughey M, et al. Forecasting life expectancy, years of life lost, and all-cause and cause-specific mortality for 250 causes of death: reference and alternative scenarios for 2016-40 for 195 countries and territories. *Lancet*. 2018;392(10159):2052-90.
4. Bikbov B, Purcell CA, Levey AS, Smith M, Abdoli A, Abebe M, et al. Global, regional, and national burden of chronic kidney disease, 1990-2017: a systematic analysis for the Global Burden of Disease Study 2017. *The Lancet*. 2020;395(10225):709-33.
5. Jafar TH, Ramakrishnan C, John O, Tewari A, Cobb B, Legido-Quigley H, et al. Access to CKD Care in Rural Communities of India: a qualitative study exploring the barriers and potential facilitators. *BMC Nephrol*. 2020;21(1):26.
6. Yarnoff BO, Hoerger TJ, Simpson SK, Leib A, Burrows NR, Shrestha SS, et al. The costeffectiveness of using chronic kidney disease risk scores to screen for early-stage chronic kidney disease. *BMC Nephrol*. 2017;18(1):85.
7. Bradshaw C, Kondal D, Montez-Rath ME, Han J, Zheng Y, Shivashankar R, et al. Early detection of chronic kidney disease in low-income and middle-income countries: development and validation of a point-of-care screening strategy for India. *BMJ Glob Health*. 2019;4(5):e001644.
8. Misir R, Mitra M, Samanta RK. A Reduced Set of Features for Chronic Kidney Disease Prediction. *J Pathol Inform*. 2017;8:24.
9. Chang HL, Wu CC, Lee SP, Chen YK, Su W, Su SL. A predictive model for progression of CKD. *Medicine (Baltimore)*. 2019;98(26):e16186.
11. Lerner B, Desrochers S, Tangri N. Risk Prediction Models in CKD. *Semin Nephrol*. 2017;37(2):144-50.
12. Tangri N, Inker LA, Hiebert B, Wong J, Naimark D, Kent D, et al. A Dynamic Predictive Model for Progression of CKD. *American journal of kidney diseases : the official journal of the National Kidney Foundation*. 2017;69(4):514-20.
13. Grant SW, Collins GS, Nashef SAM. Statistical Primer: developing and validating a risk prediction model. *Eur J Cardiothorac Surg*. 2018;54(2):203-8.
14. Boulware LE, Jaar BG, Tarver-Carr ME, Brancati FL, Powe NR. Screening for Proteinuria in US Adults A Cost-effectiveness Analysis. *JAMA*. 2003;290(23):3101-14.
16. Hoerger TJ, Wittenborn JS, Segel JE, Burrows NR, Imai K, Eggers P, et al. A health policy model of CKD: 2. The cost-effectiveness of microalbuminuria screening. *American journal of kidney diseases : the official journal of the National Kidney Foundation*. 2010;55(3):463-73.
17. Manns B, Hemmelgarn B, Tonelli M, Au F, Chiasson TC, Dong J, et al. Population based screening for chronic kidney disease: cost effectiveness study. *BMJ*. 2010;341:c5869.
18. Komenda P, Ferguson TW, Macdonald K, Rigatto C, Koolage C, Sood MM, et al. Costeffectiveness of primary screening for CKD: a systematic review. *American journal of kidney diseases : the official journal of the National Kidney Foundation*. 2014;63(5):789-97.
19. Echouffo-Tcheugui JB, Kengne AP. Risk models to predict chronic kidney disease and its progression: a systematic review. *PLoS medicine*. 2012;9(11):e1001344.
20. Ramspek CL, de Jong Y, Dekker FW, van Diepen M. Towards the best kidney failure prediction tool: a systematic review and selection aid. *Nephrology Dialysis Transplantation*. 2019;35(9):1527-38.

21. Page MJ, McKenzie JE, Bossuyt PM, Boutron I, Hoffmann TC, Mulrow CD, et al. The PRISMA 2020 statement: an updated guideline for reporting systematic reviews. *BMJ*. 2021;372:n71.
22. Moons KG, de Groot JA, Bouwmeester W, Vergouwe Y, Mallett S, Altman DG, et al. Critical appraisal and data extraction for systematic reviews of prediction modelling studies: the CHARMS checklist. *PLoS medicine*. 2014;11(10):e1001744.
23. Moons KGM, Wolff RF, Riley RD, Whiting PF, Westwood M, Collins GS, et al. PROBAST: A Tool to Assess Risk of Bias and Applicability of Prediction Model Studies: Explanation and Elaboration. *Annals of internal medicine*. 2019;170(1):W1-W33.
24. Bank TW. World Bank Country and Lending Groups 2021 [Available from: <https://datahelpdesk.worldbank.org/knowledgebase/articles/906519-world-bank-countryand-lending-groups>].

**S1 Table: PRISMA Checklist**

| Section and Topic    | Item # | Checklist item                                                                                                                                                                                            | Location where item is reported |
|----------------------|--------|-----------------------------------------------------------------------------------------------------------------------------------------------------------------------------------------------------------|---------------------------------|
| <b>TITLE</b>         |        |                                                                                                                                                                                                           |                                 |
| Title                | 1      | Identify the report as a systematic review.                                                                                                                                                               | page 01                         |
| <b>ABSTRACT</b>      |        |                                                                                                                                                                                                           |                                 |
| Abstract             | 2      | See the PRISMA 2020 for Abstracts checklist.                                                                                                                                                              | page 02                         |
| <b>INTRODUCTION</b>  |        |                                                                                                                                                                                                           |                                 |
| Rationale            | 3      | Describe the rationale for the review in the context of existing knowledge.                                                                                                                               | page 03                         |
| Objectives           | 4      | Provide an explicit statement of the objective(s) or question(s) the review addresses.                                                                                                                    | page 04                         |
| <b>METHODS</b>       |        |                                                                                                                                                                                                           |                                 |
| Eligibility criteria | 5      | Specify the inclusion and exclusion criteria for the review and how studies were grouped for the syntheses.                                                                                               | page 04-05                      |
| Information sources  | 6      | Specify all databases, registers, websites, organisations, reference lists and other sources searched or consulted to identify studies. Specify the date when each source was last searched or consulted. | page 04                         |



|                               |     |                                                                                                                                                                                                                                                                                                      |                          |
|-------------------------------|-----|------------------------------------------------------------------------------------------------------------------------------------------------------------------------------------------------------------------------------------------------------------------------------------------------------|--------------------------|
| Search strategy               | 7   | Present the full search strategies for all databases, registers and websites, including any filters and limits used.                                                                                                                                                                                 | supplementary page 03-07 |
| Selection process             | 8   | Specify the methods used to decide whether a study met the inclusion criteria of the review, including how many reviewers screened each record and each report retrieved, whether they worked independently, and if applicable, details of automation tools used in the process.                     | page 05                  |
| Data collection process       | 9   | Specify the methods used to collect data from reports, including how many reviewers collected data from each report, whether they worked independently, any processes for obtaining or confirming data from study investigators, and if applicable, details of automation tools used in the process. | page 05-06               |
| Data items                    | 10a | List and define all outcomes for which data were sought. Specify whether all results that were compatible with each outcome domain in each study were sought (e.g. for all measures, time points, analyses), and if not, the methods used to decide which results to collect.                        | page 04-05, table 1      |
|                               | 10b | List and define all other variables for which data were sought (e.g. participant and intervention characteristics, funding sources). Describe any assumptions made about any missing or unclear information.                                                                                         | page 04-05, table 1      |
| Study risk of bias assessment | 11  | Specify the methods used to assess risk of bias in the included studies, including details of the tool(s) used, how many reviewers assessed each study and whether they worked independently, and if applicable, details of automation tools used in the process.                                    | page 06                  |
| Effect measures               | 12  | Specify for each outcome the effect measure(s) (e.g. risk ratio, mean difference) used in the synthesis or presentation of results.                                                                                                                                                                  | NA                       |
| Synthesis methods             | 13a | Describe the processes used to decide which studies were eligible for each synthesis (e.g. tabulating the study intervention characteristics and comparing against the planned groups for each synthesis (item #5)).                                                                                 | page 06                  |
|                               | 13b | Describe any methods required to prepare the data for presentation or synthesis, such as handling of missing summary statistics, or data conversions.                                                                                                                                                | NA                       |
|                               | 13c | Describe any methods used to tabulate or visually display results of individual studies and syntheses.                                                                                                                                                                                               | page 06                  |

|                           |     |                                                                                                                                                                                                                                                             |                                   |
|---------------------------|-----|-------------------------------------------------------------------------------------------------------------------------------------------------------------------------------------------------------------------------------------------------------------|-----------------------------------|
|                           | 13d | Describe any methods used to synthesize results and provide a rationale for the choice(s). If meta-analysis was performed, describe the model(s), method(s) to identify the presence and extent of statistical heterogeneity, and software package(s) used. | page 06                           |
|                           | 13e | Describe any methods used to explore possible causes of heterogeneity among study results (e.g. subgroup analysis, meta-regression).                                                                                                                        | NA                                |
|                           | 13f | Describe any sensitivity analyses conducted to assess robustness of the synthesized results.                                                                                                                                                                | NA                                |
| Reporting bias assessment | 14  | Describe any methods used to assess risk of bias due to missing results in a synthesis (arising from reporting biases).                                                                                                                                     | NA                                |
| Certainty assessment      | 15  | Describe any methods used to assess certainty (or confidence) in the body of evidence for an outcome.                                                                                                                                                       | page 11                           |
| <b>RESULTS</b>            |     |                                                                                                                                                                                                                                                             |                                   |
| Study selection           | 16a | Describe the results of the search and selection process, from the number of records identified in the search to the number of studies included in the review, ideally using a flow diagram.                                                                | page 06-07                        |
|                           | 16b | Cite studies that might appear to meet the inclusion criteria, but which were excluded, and explain why they were excluded.                                                                                                                                 | page 06-07                        |
| Study characteristics     | 17  | Cite each included study and present its characteristics.                                                                                                                                                                                                   | page 08-09                        |
| Risk of bias in studies   | 18  | Present assessments of risk of bias for each included study.                                                                                                                                                                                                | page 11, supplementary page 39-45 |

|                               |     |                                                                                                                                                                                                                                                                                      |            |
|-------------------------------|-----|--------------------------------------------------------------------------------------------------------------------------------------------------------------------------------------------------------------------------------------------------------------------------------------|------------|
| Results of individual studies | 19  | For all outcomes, present, for each study: (a) summary statistics for each group (where appropriate) and (b) an effect estimate and its precision (e.g. confidence/credible interval), ideally using structured tables or plots.                                                     | page 9-11  |
| Results of syntheses          | 20a | For each synthesis, briefly summarise the characteristics and risk of bias among contributing studies.                                                                                                                                                                               | page 9-11  |
|                               | 20b | Present results of all statistical syntheses conducted. If meta-analysis was done, present for each the summary estimate and its precision (e.g. confidence/credible interval) and measures of statistical heterogeneity. If comparing groups, describe the direction of the effect. | table 3    |
|                               | 20c | Present results of all investigations of possible causes of heterogeneity among study results.                                                                                                                                                                                       | NA         |
|                               | 20d | Present results of all sensitivity analyses conducted to assess the robustness of the synthesized results.                                                                                                                                                                           | NA         |
| Reporting biases              | 21  | Present assessments of risk of bias due to missing results (arising from reporting biases) for each synthesis assessed.                                                                                                                                                              | NA         |
| Certainty of evidence         | 22  | Present assessments of certainty (or confidence) in the body of evidence for each outcome assessed.                                                                                                                                                                                  | page 11    |
| <b>DISCUSSION</b>             |     |                                                                                                                                                                                                                                                                                      |            |
| Discussion                    | 23a | Provide a general interpretation of the results in the context of other evidence.                                                                                                                                                                                                    | page 11    |
|                               | 23b | Discuss any limitations of the evidence included in the review.                                                                                                                                                                                                                      | page 11-13 |
|                               | 23c | Discuss any limitations of the review processes used.                                                                                                                                                                                                                                | page 11-13 |

|                                                |     |                                                                                                                                                                                                                                            |            |
|------------------------------------------------|-----|--------------------------------------------------------------------------------------------------------------------------------------------------------------------------------------------------------------------------------------------|------------|
|                                                | 23d | Discuss implications of the results for practice, policy, and future research.                                                                                                                                                             | page 14-15 |
| <b>OTHER INFORMATION</b>                       |     |                                                                                                                                                                                                                                            |            |
| Registration and protocol                      | 24a | Provide registration information for the review, including register name and registration number, or state that the review was not registered.                                                                                             | page 04    |
|                                                | 24b | Indicate where the review protocol can be accessed, or state that a protocol was not prepared.                                                                                                                                             | page 04    |
|                                                | 24c | Describe and explain any amendments to information provided at registration or in the protocol.                                                                                                                                            | NA         |
| Support                                        | 25  | Describe sources of financial or non-financial support for the review, and the role of the funders or sponsors in the review.                                                                                                              | page 01    |
| Competing interests                            | 26  | Declare any competing interests of review authors.                                                                                                                                                                                         | page 01    |
| Availability of data, code and other materials | 27  | Report which of the following are publicly available and where they can be found: template data collection forms; data extracted from included studies; data used for all analyses; analytic code; any other materials used in the review. | page 15    |

NA: Not applicable

**S2 Table: Search terms****S2.1 Table: Embase, Medline and Global Health (OVID)**

|    |                                                                                                                                                                                                                                                                                                                                                                                                                                                                                                                                                                                                                                                                                                                                                                                                                                                                                                                                                                                                                                                                                                                                                                                                                                                                                                                                                                                                                                                                                                                                                                                                                                                                                                                                                                                                                                                                                                                                                                                                                                                                                                                                                                                                                                                                                                                                                                                                                                                                                 |
|----|---------------------------------------------------------------------------------------------------------------------------------------------------------------------------------------------------------------------------------------------------------------------------------------------------------------------------------------------------------------------------------------------------------------------------------------------------------------------------------------------------------------------------------------------------------------------------------------------------------------------------------------------------------------------------------------------------------------------------------------------------------------------------------------------------------------------------------------------------------------------------------------------------------------------------------------------------------------------------------------------------------------------------------------------------------------------------------------------------------------------------------------------------------------------------------------------------------------------------------------------------------------------------------------------------------------------------------------------------------------------------------------------------------------------------------------------------------------------------------------------------------------------------------------------------------------------------------------------------------------------------------------------------------------------------------------------------------------------------------------------------------------------------------------------------------------------------------------------------------------------------------------------------------------------------------------------------------------------------------------------------------------------------------------------------------------------------------------------------------------------------------------------------------------------------------------------------------------------------------------------------------------------------------------------------------------------------------------------------------------------------------------------------------------------------------------------------------------------------------|
| 01 | chronic renal insufficiency.mp.                                                                                                                                                                                                                                                                                                                                                                                                                                                                                                                                                                                                                                                                                                                                                                                                                                                                                                                                                                                                                                                                                                                                                                                                                                                                                                                                                                                                                                                                                                                                                                                                                                                                                                                                                                                                                                                                                                                                                                                                                                                                                                                                                                                                                                                                                                                                                                                                                                                 |
| 02 | chronic kidney disease.mp.                                                                                                                                                                                                                                                                                                                                                                                                                                                                                                                                                                                                                                                                                                                                                                                                                                                                                                                                                                                                                                                                                                                                                                                                                                                                                                                                                                                                                                                                                                                                                                                                                                                                                                                                                                                                                                                                                                                                                                                                                                                                                                                                                                                                                                                                                                                                                                                                                                                      |
| 03 | chronic kidney failure.mp.                                                                                                                                                                                                                                                                                                                                                                                                                                                                                                                                                                                                                                                                                                                                                                                                                                                                                                                                                                                                                                                                                                                                                                                                                                                                                                                                                                                                                                                                                                                                                                                                                                                                                                                                                                                                                                                                                                                                                                                                                                                                                                                                                                                                                                                                                                                                                                                                                                                      |
| 04 | CKD.mp.                                                                                                                                                                                                                                                                                                                                                                                                                                                                                                                                                                                                                                                                                                                                                                                                                                                                                                                                                                                                                                                                                                                                                                                                                                                                                                                                                                                                                                                                                                                                                                                                                                                                                                                                                                                                                                                                                                                                                                                                                                                                                                                                                                                                                                                                                                                                                                                                                                                                         |
| 05 | exp Renal Insufficiency, Chronic/                                                                                                                                                                                                                                                                                                                                                                                                                                                                                                                                                                                                                                                                                                                                                                                                                                                                                                                                                                                                                                                                                                                                                                                                                                                                                                                                                                                                                                                                                                                                                                                                                                                                                                                                                                                                                                                                                                                                                                                                                                                                                                                                                                                                                                                                                                                                                                                                                                               |
| 06 | (chronic adj2 kidney adj2 disease).mp.                                                                                                                                                                                                                                                                                                                                                                                                                                                                                                                                                                                                                                                                                                                                                                                                                                                                                                                                                                                                                                                                                                                                                                                                                                                                                                                                                                                                                                                                                                                                                                                                                                                                                                                                                                                                                                                                                                                                                                                                                                                                                                                                                                                                                                                                                                                                                                                                                                          |
| 07 | (chronic adj2 kidney adj2 failure).mp.                                                                                                                                                                                                                                                                                                                                                                                                                                                                                                                                                                                                                                                                                                                                                                                                                                                                                                                                                                                                                                                                                                                                                                                                                                                                                                                                                                                                                                                                                                                                                                                                                                                                                                                                                                                                                                                                                                                                                                                                                                                                                                                                                                                                                                                                                                                                                                                                                                          |
| 08 | chronic renal failure.mp.                                                                                                                                                                                                                                                                                                                                                                                                                                                                                                                                                                                                                                                                                                                                                                                                                                                                                                                                                                                                                                                                                                                                                                                                                                                                                                                                                                                                                                                                                                                                                                                                                                                                                                                                                                                                                                                                                                                                                                                                                                                                                                                                                                                                                                                                                                                                                                                                                                                       |
| 09 | chronic renal disease.mp.                                                                                                                                                                                                                                                                                                                                                                                                                                                                                                                                                                                                                                                                                                                                                                                                                                                                                                                                                                                                                                                                                                                                                                                                                                                                                                                                                                                                                                                                                                                                                                                                                                                                                                                                                                                                                                                                                                                                                                                                                                                                                                                                                                                                                                                                                                                                                                                                                                                       |
| 10 | chronic kidney insufficiency.mp.                                                                                                                                                                                                                                                                                                                                                                                                                                                                                                                                                                                                                                                                                                                                                                                                                                                                                                                                                                                                                                                                                                                                                                                                                                                                                                                                                                                                                                                                                                                                                                                                                                                                                                                                                                                                                                                                                                                                                                                                                                                                                                                                                                                                                                                                                                                                                                                                                                                |
| 11 | end stage renal disease.mp.                                                                                                                                                                                                                                                                                                                                                                                                                                                                                                                                                                                                                                                                                                                                                                                                                                                                                                                                                                                                                                                                                                                                                                                                                                                                                                                                                                                                                                                                                                                                                                                                                                                                                                                                                                                                                                                                                                                                                                                                                                                                                                                                                                                                                                                                                                                                                                                                                                                     |
| 12 | ESRD.mp.                                                                                                                                                                                                                                                                                                                                                                                                                                                                                                                                                                                                                                                                                                                                                                                                                                                                                                                                                                                                                                                                                                                                                                                                                                                                                                                                                                                                                                                                                                                                                                                                                                                                                                                                                                                                                                                                                                                                                                                                                                                                                                                                                                                                                                                                                                                                                                                                                                                                        |
| 13 | kidney function.mp.                                                                                                                                                                                                                                                                                                                                                                                                                                                                                                                                                                                                                                                                                                                                                                                                                                                                                                                                                                                                                                                                                                                                                                                                                                                                                                                                                                                                                                                                                                                                                                                                                                                                                                                                                                                                                                                                                                                                                                                                                                                                                                                                                                                                                                                                                                                                                                                                                                                             |
| 14 | renal function.mp.                                                                                                                                                                                                                                                                                                                                                                                                                                                                                                                                                                                                                                                                                                                                                                                                                                                                                                                                                                                                                                                                                                                                                                                                                                                                                                                                                                                                                                                                                                                                                                                                                                                                                                                                                                                                                                                                                                                                                                                                                                                                                                                                                                                                                                                                                                                                                                                                                                                              |
| 15 | kidney dysfunction.mp.                                                                                                                                                                                                                                                                                                                                                                                                                                                                                                                                                                                                                                                                                                                                                                                                                                                                                                                                                                                                                                                                                                                                                                                                                                                                                                                                                                                                                                                                                                                                                                                                                                                                                                                                                                                                                                                                                                                                                                                                                                                                                                                                                                                                                                                                                                                                                                                                                                                          |
| 16 | renal dysfunction.mp.                                                                                                                                                                                                                                                                                                                                                                                                                                                                                                                                                                                                                                                                                                                                                                                                                                                                                                                                                                                                                                                                                                                                                                                                                                                                                                                                                                                                                                                                                                                                                                                                                                                                                                                                                                                                                                                                                                                                                                                                                                                                                                                                                                                                                                                                                                                                                                                                                                                           |
| 17 | 01 or 02 or 03 or 04 or 05 or 06 or 07 or 08 or 09 or 10 or 11 or 12 or 13 or 14 or 15 or 16                                                                                                                                                                                                                                                                                                                                                                                                                                                                                                                                                                                                                                                                                                                                                                                                                                                                                                                                                                                                                                                                                                                                                                                                                                                                                                                                                                                                                                                                                                                                                                                                                                                                                                                                                                                                                                                                                                                                                                                                                                                                                                                                                                                                                                                                                                                                                                                    |
| 18 | ((("Afghanistan") or ("Benin") or ("Burkina Faso") or ("Burundi") or ("Central African Republic") or ("Chad") or ("Comoros") or ("Democratic Republic of the Congo") or ("Eritrea") or ("Ethiopia") or ("Gambia") or ("Guinea") or ("Guinea-Bissau") or ("Haiti") or ("Democratic People's Republic of Korea") or ("Liberia") or ("Madagascar") or ("Malawi") or ("Mali") or ("Mozambique") or ("Nepal") or ("Niger") or ("Rwanda") or ("Senegal") or ("Sierra Leone") or ("Somalia") or ("South Sudan") or ("Tanzania") or ("Togo") or ("Uganda") or ("Zimbabwe") or ("Armenia") or ("Bangladesh") or ("Bhutan") or ("Bolivia") or ("Cape Verde") or ("Cambodia") or ("Cameroon") or ("Congo") or ("Cote d'Ivoire") or ("Djibouti") or ("Egypt") or ("El Salvador") or ("Ghana") or ("Guatemala") or ("Honduras") or ("India") or ("Indonesia") or ("Kenya") or ("Micronesia") or ("Kosovo") or ("Kyrgyzstan") or ("Laos") or ("Lesotho") or ("Mauritania") or ("Moldova") or ("Mongolia") or ("Morocco") or ("Myanmar") or ("Nicaragua") or ("Nigeria") or ("Pakistan") or ("Papua New Guinea") or ("Philippines") or ("Samoa") or ("Atlantic Islands") or ("Melanesia") or ("Sri Lanka") or ("Sudan") or ("Swaziland") or ("Syria") or ("Tajikistan") or ("Timor-Leste") or ("Tonga") or ("Tunisia") or ("Ukraine") or ("Uzbekistan") or ("Vanuatu") or ("Vietnam") or ("Middle East") or ("Yemen") or ("Zambia") or ("Albania") or ("Algeria") or ("American Samoa") or ("Angola") or ("Argentina") or ("Azerbaijan") or ("Republic of Belarus") or ("Belize") or ("Bosnia and Herzegovina") or ("Botswana") or ("Brazil") or ("Bulgaria") or ("China") or ("Colombia") or ("Costa Rica") or ("Cuba") or ("Dominica") or ("Dominican Republic") or ("Equatorial Guinea") or ("Ecuador") or ("Fiji") or ("Gabon") or ("Georgia") or ("Grenada") or ("Guyana") or ("Iran") or ("Iraq") or ("Jamaica") or ("Jordan") or ("Kazakhstan") or ("Lebanon") or ("Libya") or ("Macedonia") or ("Malaysia") or ("Indian Ocean Islands") or ("Mexico") or ("Montenegro") or ("Namibia") or ("Palau") or ("Panama") or ("Paraguay") or ("Peru") or ("Russia") or ("Serbia") or ("South Africa") or ("Saint Lucia") or ("Saint Vincent and the Grenadines") or ("Suriname") or ("Thailand") or ("Turkey") or ("Turkmenistan") or ("Venezuela") or (developing countr*) or (lowincome countr*) or (middle-income countr*) or (low-middle income countr*) or (upper-middle income countr*)) |
| 19 | risk assessment.mp.                                                                                                                                                                                                                                                                                                                                                                                                                                                                                                                                                                                                                                                                                                                                                                                                                                                                                                                                                                                                                                                                                                                                                                                                                                                                                                                                                                                                                                                                                                                                                                                                                                                                                                                                                                                                                                                                                                                                                                                                                                                                                                                                                                                                                                                                                                                                                                                                                                                             |
| 20 | risk functions.mp.                                                                                                                                                                                                                                                                                                                                                                                                                                                                                                                                                                                                                                                                                                                                                                                                                                                                                                                                                                                                                                                                                                                                                                                                                                                                                                                                                                                                                                                                                                                                                                                                                                                                                                                                                                                                                                                                                                                                                                                                                                                                                                                                                                                                                                                                                                                                                                                                                                                              |
| 21 | Risk Assessment/mt                                                                                                                                                                                                                                                                                                                                                                                                                                                                                                                                                                                                                                                                                                                                                                                                                                                                                                                                                                                                                                                                                                                                                                                                                                                                                                                                                                                                                                                                                                                                                                                                                                                                                                                                                                                                                                                                                                                                                                                                                                                                                                                                                                                                                                                                                                                                                                                                                                                              |
| 22 | risk equation\$.mp.                                                                                                                                                                                                                                                                                                                                                                                                                                                                                                                                                                                                                                                                                                                                                                                                                                                                                                                                                                                                                                                                                                                                                                                                                                                                                                                                                                                                                                                                                                                                                                                                                                                                                                                                                                                                                                                                                                                                                                                                                                                                                                                                                                                                                                                                                                                                                                                                                                                             |
| 23 | risk chart?.mp.                                                                                                                                                                                                                                                                                                                                                                                                                                                                                                                                                                                                                                                                                                                                                                                                                                                                                                                                                                                                                                                                                                                                                                                                                                                                                                                                                                                                                                                                                                                                                                                                                                                                                                                                                                                                                                                                                                                                                                                                                                                                                                                                                                                                                                                                                                                                                                                                                                                                 |
| 24 | (risk adj3 tool\$.mp.                                                                                                                                                                                                                                                                                                                                                                                                                                                                                                                                                                                                                                                                                                                                                                                                                                                                                                                                                                                                                                                                                                                                                                                                                                                                                                                                                                                                                                                                                                                                                                                                                                                                                                                                                                                                                                                                                                                                                                                                                                                                                                                                                                                                                                                                                                                                                                                                                                                           |
| 25 | risk assessment function?.mp.                                                                                                                                                                                                                                                                                                                                                                                                                                                                                                                                                                                                                                                                                                                                                                                                                                                                                                                                                                                                                                                                                                                                                                                                                                                                                                                                                                                                                                                                                                                                                                                                                                                                                                                                                                                                                                                                                                                                                                                                                                                                                                                                                                                                                                                                                                                                                                                                                                                   |
| 26 | risk assessor.mp.                                                                                                                                                                                                                                                                                                                                                                                                                                                                                                                                                                                                                                                                                                                                                                                                                                                                                                                                                                                                                                                                                                                                                                                                                                                                                                                                                                                                                                                                                                                                                                                                                                                                                                                                                                                                                                                                                                                                                                                                                                                                                                                                                                                                                                                                                                                                                                                                                                                               |
| 27 | risk appraisal\$.mp.                                                                                                                                                                                                                                                                                                                                                                                                                                                                                                                                                                                                                                                                                                                                                                                                                                                                                                                                                                                                                                                                                                                                                                                                                                                                                                                                                                                                                                                                                                                                                                                                                                                                                                                                                                                                                                                                                                                                                                                                                                                                                                                                                                                                                                                                                                                                                                                                                                                            |
| 28 | risk calculation\$.mp.                                                                                                                                                                                                                                                                                                                                                                                                                                                                                                                                                                                                                                                                                                                                                                                                                                                                                                                                                                                                                                                                                                                                                                                                                                                                                                                                                                                                                                                                                                                                                                                                                                                                                                                                                                                                                                                                                                                                                                                                                                                                                                                                                                                                                                                                                                                                                                                                                                                          |
| 29 | risk calculator\$.mp.                                                                                                                                                                                                                                                                                                                                                                                                                                                                                                                                                                                                                                                                                                                                                                                                                                                                                                                                                                                                                                                                                                                                                                                                                                                                                                                                                                                                                                                                                                                                                                                                                                                                                                                                                                                                                                                                                                                                                                                                                                                                                                                                                                                                                                                                                                                                                                                                                                                           |

|    |                                                                                                                                                                                                                |
|----|----------------------------------------------------------------------------------------------------------------------------------------------------------------------------------------------------------------|
| 30 | risk factor\$ calculator\$.mp.                                                                                                                                                                                 |
| 31 | risk factor\$ calculation\$.mp.                                                                                                                                                                                |
| 32 | risk engine\$.mp.                                                                                                                                                                                              |
| 33 | risk equation\$.mp.                                                                                                                                                                                            |
| 34 | risk table\$.mp.                                                                                                                                                                                               |
| 35 | risk threshold\$.mp.                                                                                                                                                                                           |
| 36 | risk disc?.mp.                                                                                                                                                                                                 |
| 37 | risk disk?.mp.                                                                                                                                                                                                 |
| 38 | risk scoring method?.mp.                                                                                                                                                                                       |
| 39 | scoring scheme?.mp.                                                                                                                                                                                            |
| 40 | risk scoring system?.mp.                                                                                                                                                                                       |
| 41 | risk scal\$.mp.                                                                                                                                                                                                |
| 42 | risk prediction?.mp.                                                                                                                                                                                           |
| 43 | risk algorithm\$.mp.                                                                                                                                                                                           |
| 44 | prediction model\$.mp.                                                                                                                                                                                         |
| 45 | predictive instrument?.mp.                                                                                                                                                                                     |
| 46 | project\$ risk?.mp.                                                                                                                                                                                            |
| 47 | predictive model?.mp.                                                                                                                                                                                          |
| 48 | scoring method\$.mp.                                                                                                                                                                                           |
| 49 | (prediction\$ adj3 method\$).mp.                                                                                                                                                                               |
| 50 | exp Risk Assessment/                                                                                                                                                                                           |
| 51 | (risk? adj1 assess\$).mp.                                                                                                                                                                                      |
| 52 | screening.mp.                                                                                                                                                                                                  |
| 53 | diagnostic test.mp.                                                                                                                                                                                            |
| 54 | 19 or 20 or 21 or 22 or 23 or 24 or 25 or 26 or 27 or 28 or 29 or 30 or 31 or 32 or 33 or 34 or 35 or 36 or 37 or 38 or 39 or 40 or 41 or 42 or 43 or 44 or 45 or 46 or 47 or 48 or 49 or 50 or 51 or 52 or 53 |
| 55 | 17 and 18 and 54                                                                                                                                                                                               |
| 56 | exp animals/ not humans.sh.                                                                                                                                                                                    |
| 57 | 55 not 56                                                                                                                                                                                                      |
| 58 | Remove duplicates from 57                                                                                                                                                                                      |

## S2.2 Table: SCOPUS

((TITLE-ABS-KEY("Afghanistan") OR TITLE-ABS-KEY("Benin") OR TITLE-ABS-KEY("Burkina Faso") OR TITLE-ABS-KEY("Burundi") OR TITLE-ABS-KEY("Central African Republic") OR TITLE-ABS-KEY("Chad") OR TITLE-ABS-KEY("Comoros") OR TITLE-ABS-KEY("Democratic Republic of the Congo") OR TITLE-ABS-KEY("Eritrea") OR TITLE-ABS-KEY("Ethiopia") OR TITLE-ABS-KEY("Gambia") OR TITLE-ABS-KEY("Guinea") OR TITLE-ABS-KEY("Guinea-Bissau") OR TITLE-ABS-KEY("Haiti") OR TITLE-ABS-KEY("Democratic People's Republic of Korea") OR TITLE-ABS-KEY("Liberia") OR TITLE-ABS-KEY("Madagascar") OR TITLE-ABS-KEY("Malawi") OR TITLE-ABS-KEY("Mali") OR TITLE-ABS-KEY("Mozambique") OR TITLE-ABS-KEY("Nepal") OR TITLE-ABS-KEY("Niger") OR TITLE-ABS-KEY("Rwanda") OR TITLE-ABS-KEY("Senegal") OR TITLE-ABS-KEY("Sierra Leone") OR TITLE-ABS-KEY("Somalia") OR TITLE-ABS-KEY("South Sudan") OR TITLE-ABS-KEY("Tanzania") OR TITLE-ABS-KEY("Togo") OR TITLE-ABS-KEY("Uganda") OR TITLE-ABS-KEY("Zimbabwe") OR TITLE-ABS-KEY("Armenia") OR TITLE-ABS-KEY("Bangladesh") OR TITLE-ABS-KEY("Bhutan") OR TITLE-ABS-KEY("Bolivia") OR TITLE-ABS-KEY("Cape Verde") OR TITLE-ABS-KEY("Cambodia") OR TITLE-ABS-KEY("Cameroon") OR TITLE-ABS-KEY("Congo") OR TITLE-ABS-KEY("Cote d'Ivoire") OR TITLE-ABS-KEY("Djibouti") OR TITLE-ABS-KEY("Bolivia") OR TITLE-ABS-KEY("Cape Verde") OR TITLE-ABS-KEY("Cambodia") OR TITLE-ABS-KEY("Cameroon") OR TITLE-ABS-KEY("Congo") OR TITLE-ABS-KEY("Cote d'Ivoire") OR TITLE-ABS-KEY("Djibouti") OR TITLE-ABS-KEY("Egypt") OR TITLE-ABS-KEY("El Salvador") OR TITLE-ABS-KEY("Ghana") OR TITLE-ABS-KEY("Guatemala") OR TITLE-ABS-KEY("Honduras") OR TITLE-ABS-KEY("India") OR TITLE-ABS-KEY("Indonesia") OR TITLE-ABS-KEY("Kenya") OR TITLE-ABS-KEY("Micronesia") OR TITLE-ABS-KEY("Kosovo") OR TITLE-ABS-KEY("Kyrgyzstan") OR TITLE-ABS-KEY("Laos") OR TITLE-ABS-KEY("Lesotho") OR TITLE-ABS-KEY("Mauritania") OR TITLE-ABS-KEY("Moldova") OR TITLE-ABS-KEY("Mongolia") OR TITLE-ABS-KEY("Morocco") OR TITLE-

ABS-KEY("Myanmar") OR TITLE-ABS-KEY("Nicaragua") OR TITLE-ABS-KEY("Nigeria") OR TITLE-ABS-KEY("Pakistan") OR TITLE-ABS-KEY("Papua New Guinea") OR TITLE-ABS-KEY("Philippines") OR TITLE-ABS-KEY("Samoa") OR TITLE-ABS-KEY("Atlantic Islands") OR TITLE-ABS-KEY("Melanesia") OR TITLE-ABS-KEY("Sri Lanka") OR TITLE-ABS-KEY("Sudan") OR TITLE-ABS-KEY("Swaziland") OR TITLE-ABS-KEY("Syria") OR TITLE-ABS-KEY("Tajikistan") OR TITLE-ABS-KEY("Timor-Leste") OR TITLE-ABS-KEY("Tonga") OR TITLE-ABS-KEY("Tunisia") OR TITLE-ABS-KEY("Ukraine") OR TITLE-ABS-KEY("Uzbekistan") OR TITLE-ABS-KEY("Vanuatu") OR TITLE-ABS-KEY("Vietnam") OR TITLE-ABS-KEY("Middle East") OR TITLE-ABS-KEY("Yemen") OR TITLE-ABS-KEY("Zambia") OR TITLE-ABS-KEY("Albania") OR TITLE-ABS-KEY("Algeria") OR TITLE-ABS-KEY("American Samoa") OR TITLE-ABS-KEY("Angola") OR TITLE-ABS-KEY("Argentina") OR TITLE-ABS-KEY("Azerbaijan") OR TITLE-ABS-KEY("Republic of Belarus") OR TITLE-ABS-KEY("Belize") OR TITLE-ABS-KEY("Bosnia and Herzegovina") OR TITLE-ABS-KEY("Botswana") OR TITLE-ABS-KEY("Brazil") OR TITLE-ABS-KEY("Bulgaria") OR TITLE-ABS-KEY("China") OR TITLE-ABS-KEY("Colombia") OR TITLE-ABS-KEY("Costa Rica") OR TITLE-ABS-KEY("Cuba") OR TITLE-ABS-KEY("Dominica") OR TITLE-ABS-KEY("Dominican Republic") OR TITLE-ABS-KEY("Equatorial Guinea") OR TITLE-ABS-KEY("Ecuador") OR TITLE-ABS-KEY("Fiji") OR TITLE-ABS-KEY("Gabon") OR TITLE-ABS-KEY("Georgia") OR TITLE-ABS-KEY("Grenada") OR TITLE-ABS-KEY("Guyana") OR TITLE-ABS-KEY("Iran") OR TITLE-ABS-KEY("Iraq") OR TITLE-ABS-KEY("Jamaica") OR TITLE-ABS-KEY("Jordan") OR TITLE-ABS-KEY("Kazakhstan") OR TITLE-ABS-KEY("Lebanon") OR TITLE-ABS-KEY("Libya") OR TITLE-ABS-KEY("Macedonia (Republic)") OR TITLE-ABS-KEY("Malaysia") OR TITLE-ABS-KEY("Indian Ocean Islands") OR TITLE-ABS-KEY("Mexico") OR TITLE-ABS-KEY("Montenegro") OR TITLE-ABS-KEY("Namibia") OR TITLE-ABS-KEY("Palau") OR TITLE-ABS-KEY("Panama") OR TITLE-ABS-KEY("Paraguay") OR TITLE-ABS-KEY("Peru") OR TITLE-ABS-KEY("Russia") OR TITLE-ABS-KEY("Serbia") OR TITLE-ABS-KEY("South Africa") OR TITLE-ABS-KEY("Saint Lucia") OR TITLE-ABS-KEY("Saint Vincent and the Grenadines") OR TITLE-ABS-KEY("Suriname") OR TITLE-ABS-KEY("Thailand") OR TITLE-ABS-KEY("Turkey") OR TITLE-ABS-KEY("Turkmenistan") OR TITLE-ABS-KEY("Venezuela") OR TITLE-ABS-KEY(developing countr\*) OR TITLE-ABS-KEY(lowincome countr\*) OR TITLE-ABS-KEY(middle-income countr\*) OR TITLE-ABS-KEY(low-middle income countr\*) OR TITLE-ABS-KEY(upper-middle income countr\*) OR TITLE-ABS-KEY("low resource") OR TITLE-ABS-KEY ("underresourced") OR TITLE-ABS-KEY("resource poor") OR TITLE-ABS-KEY("under-developed") OR TITLE-ABS-KEY("underdeveloped") OR TITLE-ABS-KEY("developing world") OR TITLE-ABS-KEY("third world") OR TITLE-ABS-KEY(lmic) OR TITLE-ABS-KEY(low AND middle AND income)) AND (TITLE-ABS-KEY(Risk Assessment) OR TITLE-ABS-KEY(risk? adj1 assess\*) OR TITLE-ABS-KEY(risk function) OR TITLE-ABS-KEY(Risk Assessment) OR TITLE-ABS-KEY(risk functions) OR TITLE-ABS-KEY(risk equation\*) OR TITLE-ABS-KEY(risk chart?) OR TITLE-ABS-KEY(risk adj3 tool\*) OR TITLE-ABS-KEY(risk assessment function?) OR TITLE-ABS-KEY(risk assessor) OR TITLE-ABS-KEY(risk appraisal\*) OR TITLE-ABS-KEY(risk calculation\*) OR TITLE-ABS-KEY(risk calculator\*) OR TITLE-ABS-KEY(risk factor\* calculator\*) OR TITLE-ABS-KEY(risk factor\* calculation\*) OR TITLE-ABS-KEY(risk engine\*) OR TITLE-ABS-KEY(risk equation\*) OR TITLE-ABS-KEY(risk table\*) OR TITLE-ABS-KEY(risk threshold\*) OR TITLE-ABS-KEY(risk disc?) OR TITLE-ABS-KEY(risk disk?) OR TITLE-ABS-KEY(risk scoring method?) OR TITLE-ABS-KEY(scoring scheme?) OR TITLE-ABS-KEY(risk scoring system?) OR TITLE-ABS-KEY(risk prediction?) OR TITLE-ABS-KEY(risk algorith\*) OR TITLE-ABS-KEY(prediction model\*) OR TITLE-ABS-KEY(predictive instrument?) OR TITLE-ABS-KEY(project\* risk?) OR TITLE-ABS-KEY(predictive model?) OR TITLE-ABS-KEY(scoring method\*) OR TITLE-ABS-KEY(prediction\* adj3 method\*) OR TITLE-ABS-KEY(screening) OR TITLE-ABS-KEY(risk scal\*) OR TITLE-ABS-KEY(diagnostic test)) AND (TITLE-ABS-KEY(chronic renal insufficiency) OR TITLE-ABS-KEY(chronic kidney disease) OR TITLE-ABS-KEY(chronic kidney failure) OR TITLE-ABS-KEY(CKD) OR TITLE-ABS-KEY(chronic renal failure) OR TITLE-ABS-KEY(chronic renal disease) OR TITLE-ABS-KEY(chronic kidney insufficiency) OR TITLE-ABS-KEY(end stage renal disease) OR TITLE-ABS-KEY(ESRD) OR TITLE-ABS-KEY(kidney function) OR TITLE-ABS-KEY(renal function) OR TITLE-ABS-KEY(kidney dysfunction) OR TITLE-ABS-KEY(renal dysfunction) OR TITLE-ABS-KEY(chronic W/2 kidney W/2 disease) OR TITLE-ABS-KEY(chronic W/2 kidney W/2 failure) AND NOT DBCOLL(medl))

**S2.3 Table: WEB OF SCIENCE**

((chronic renal insufficiency) OR (chronic kidney disease) OR (chronic kidney failure) OR (CKD) OR (Renal Insufficiency, Chronic) OR (chronic NEAR/2 kidney NEAR/2 disease) OR (chronic NEAR/2 kidney NEAR/2 failure) OR (chronic renal failure) OR (chronic renal disease) OR (chronic kidney insufficiency) OR (end stage renal disease) OR (ESRD) OR (kidney function) OR (renal function) OR (kidney dysfunction) OR (renal dysfunction)) AND ((("Afghanistan") OR ("Benin") OR ("Burkina Faso") OR ("Burundi") OR ("Central African Republic") OR ("Chad") OR ("Comoros") OR ("Democratic Republic of the Congo") OR ("Eritrea") OR ("Ethiopia") OR ("Gambia") OR ("Guinea") OR ("Guinea-Bissau") OR ("Haiti") OR ("Democratic People's Republic of Korea") OR ("Liberia") OR ("Madagascar") OR ("Malawi") OR ("Mali") OR ("Mozambique") OR ("Nepal") OR ("Niger") OR ("Rwanda") OR ("Senegal") OR ("Sierra Leone") OR ("Somalia") OR ("South Sudan") OR ("Tanzania") OR ("Togo") OR ("Uganda") OR ("Zimbabwe") OR ("Armenia") OR ("Bangladesh") OR ("Bhutan") OR ("Bolivia") OR ("Cape Verde") OR ("Cambodia") OR ("Cameroon") OR ("Congo") OR ("Cote d'Ivoire") OR ("Djibouti") OR ("Egypt") OR ("El Salvador") OR ("Ghana") OR ("Guatemala") OR ("Honduras") OR ("India") OR ("Indonesia") OR ("Kenya") OR ("Micronesia") OR ("Kosovo") OR ("Kyrgyzstan") OR ("Laos") OR ("Lesotho") OR ("Mauritania") OR ("Moldova") OR ("Mongolia") OR ("Morocco") OR ("Myanmar") OR ("Nicaragua") OR ("Nigeria") OR ("Pakistan") OR ("Papua New Guinea") OR ("Philippines") OR ("Samoa") OR ("Atlantic Islands") OR ("Melanesia") OR ("Sri Lanka") OR ("Sudan") OR ("Swaziland") OR ("Syria") OR ("Tajikistan") OR ("Timor-Leste") OR ("Tonga") OR ("Tunisia") OR ("Ukraine") OR ("Uzbekistan") OR ("Vanuatu") OR ("Vietnam") OR ("Middle East") OR ("Yemen") OR ("Zambia") OR ("Albania") OR ("Algeria") OR ("American Samoa") OR ("Angola") OR ("Argentina") OR ("Azerbaijan") OR ("Republic of Belarus") OR ("Belize") OR ("Bosnia and Herzegovina") OR ("Botswana") OR ("Brazil") OR ("Bulgaria") OR ("China") OR ("Colombia") OR ("Costa Rica") OR ("Cuba") OR ("Dominica") OR ("Dominican Republic") OR ("Equatorial Guinea") OR ("Ecuador") OR ("Fiji") OR ("Gabon") OR ("Georgia") OR ("Grenada") OR ("Guyana") OR ("Iran") OR ("Iraq") OR ("Jamaica") OR ("Jordan") OR ("Kazakhstan") OR ("Lebanon") OR ("Libya") OR ("Macedonia (Republic) ") OR ("Malaysia") OR ("Indian Ocean Islands") OR ("Mexico") OR ("Montenegro") OR ("Namibia") OR ("Palau") OR ("Panama") OR ("Paraguay") OR ("Peru") OR ("Russia") OR ("Serbia") OR ("South Africa") OR ("Saint Lucia") OR ("Saint Vincent and the Grenadines") OR ("Suriname") OR ("Thailand") OR ("Turkey") OR ("Turkmenistan") OR ("Venezuela") OR (developing countr) OR (lowincome countr\*) OR (middle-income countr\*) OR (low-middle income countr\*) OR (upper-middle income countr\*)) AND ((risk assessment) OR (risk equation\$) OR (risk chart?) OR (risk NEAR/3 tool\$) OR (risk assessment function?) OR (risk assessor) OR (risk appraisal\$) OR (risk calculation\$) OR (risk calculator\$) OR (risk factor\$ calculation\$) OR (risk engine\$) OR (risk equation\$) OR (risk table\$) OR (risk threshold\$) OR (risk disc?) OR (risk disk?) OR (risk scoring method?) OR (scoring scheme?) OR (risk scoring system?) OR (risk scal\$) OR (risk prediction?) OR (risk algorithm\$) OR (prediction model\$) OR (predictive instrument?) OR (project\$ risk?) OR (predictive model?) OR (scoring method\$) OR (prediction\$ NEAR/3 method\$) OR (risk? NEAR/1 assess\$) OR (screening) OR (diagnostic test))) NOT ((animal\*) OR ("not humans"))



S3 Table: Data extraction form (by chapters)

S3.1 Table: Source of data and participants

|    |                                                                 | Source of data | Participants         |               |                    |          |                                                             |                                                                                                                                                                                                                                                                           |                        |                                 |                   |                |
|----|-----------------------------------------------------------------|----------------|----------------------|---------------|--------------------|----------|-------------------------------------------------------------|---------------------------------------------------------------------------------------------------------------------------------------------------------------------------------------------------------------------------------------------------------------------------|------------------------|---------------------------------|-------------------|----------------|
| N° | Study                                                           | Source of data | Participant location | Baseline year | End year (cohorts) | Sampling | Inclusion criteria                                          | Exclusion criteria                                                                                                                                                                                                                                                        | Outcome prevalence (%) | Outcome incidence (for cohorts) | Baseline mean age | Baseline % men |
| 1  | Asgari, 2020 European Risk Assessment tool (6-years validation) | Cohort         | Community            | 1999-2005     | 2011               | Random   | Tehran lipids and glucose study (TLGS) cohort participants. | Persons with prevalent Cardiovascular Disease (CVD), Type 2 Diabetes Mellitus or End-stage Renal Disease with (eGFR) <15 mL/min/1.73 m2. Also excluded those with missing data at baseline for creatinine (Cr), fasting plasma glucose (FPG), 2-hour postchallenge plasma | 46.02 (11.95)          | 40.1%                           | 58.34             | 29.53          |

|   |                                                                 |                 |           |           |           |        |                                                                                                                                                                                                                                                                 |                                                                                                                                                                                                                                                                                                                                                                                                                                                                            |             |       |       |       |
|---|-----------------------------------------------------------------|-----------------|-----------|-----------|-----------|--------|-----------------------------------------------------------------------------------------------------------------------------------------------------------------------------------------------------------------------------------------------------------------|----------------------------------------------------------------------------------------------------------------------------------------------------------------------------------------------------------------------------------------------------------------------------------------------------------------------------------------------------------------------------------------------------------------------------------------------------------------------------|-------------|-------|-------|-------|
|   |                                                                 |                 |           |           |           |        |                                                                                                                                                                                                                                                                 | glucose (2 h-PCG), body mass index (BMI), waist circumference (WC) and smoking status as well as participants with missing data during follow-up on Cr, FPG, 2 h-PCG and CVD status                                                                                                                                                                                                                                                                                        |             |       |       |       |
| 1 | Asgari, 2020 European Risk Assessment tool (9-years validation) | Cohort          | Community | 1999-2005 | 2009-2018 | Random | Tehran lipids and glucose study (TLGS) cohort participants.                                                                                                                                                                                                     | Persons with prevalent Cardiovascular Disease (CVD), Type 2 Diabetes Mellitus or End-stage Renal Disease with (eGFR) <15 mL/min/1.73 m <sup>2</sup> . Also excluded those with missing data at baseline for creatinine (Cr), fasting plasma glucose (FPG), 2-hour postchallenge plasma glucose (2 h-PCG), body mass index (BMI), waist circumference (WC) and smoking status as well as participants with missing data during follow-up on Cr, FPG, 2 h-PCG and CVD status | NI          | 40.6% | 48.20 | 49.70 |
| 2 | Bradshaw, 2019 - Model 1 (derivation)                           | Cross-sectional | Community | 2015      | n/a       | Random | Any individual aged ≥20 years and permanently residing in at Delhi and Chennai (CARRS-II). A permanent resident was defined as a person living in the selected household, was related to the household head and ate at least 3 meals in a week with the family. | Bedridden individuals, pregnant women, participants with missing both or either serum creatinine or urine albumin-to-creatinine ratio data and participants on dialysis.                                                                                                                                                                                                                                                                                                   | 44.9 (13.5) | 46.8% | 48.20 | 49.70 |

|   |                                        |                 |           |      |     |        |                                                                                                                                                                                                                                                                                                                                                                                                                                                                                                                   |                                                                                                                                                                           |             |       |       |       |
|---|----------------------------------------|-----------------|-----------|------|-----|--------|-------------------------------------------------------------------------------------------------------------------------------------------------------------------------------------------------------------------------------------------------------------------------------------------------------------------------------------------------------------------------------------------------------------------------------------------------------------------------------------------------------------------|---------------------------------------------------------------------------------------------------------------------------------------------------------------------------|-------------|-------|-------|-------|
|   |                                        |                 |           |      |     |        | Households were defined as “a group of people who live together, usually pool their income and eat at least one meal together a day when they are at home. This does not include people who have migrated permanently or are considered visitors”                                                                                                                                                                                                                                                                 |                                                                                                                                                                           |             |       |       |       |
| 2 | Bradshaw, 2019 - Model 2 (derivation)  | Cross-sectional | Community | 2015 | n/a | Random | Any individual aged ≥20 years and permanently residing in at Delhi and Chennai (CARRS-II). A permanent resident was defined as a person living in the selected household, was related to the household head and ate at least 3 meals in a week with the family. Households were defined as “a group of people who live together, usually pool their income and eat at least one meal together a day when they are at home. This does not include people who have migrated permanently or are considered visitors” | Bedridden individuals, pregnant women, participants with missing both or either serum creatinine or urine albumin-to- creatinine ratio data and participants on dialysis. | 44.9 (13.5) | 46.8% | 48.20 | 49.70 |
| 2 | Bradshaw, 2019 - Model 3a (derivation) | Cross-sectional | Community | 2015 | n/a | Random | Any individual aged ≥20 years and permanently residing in at Delhi and Chennai (CARRS-II). A permanent resident was defined as a person living in the selected household,                                                                                                                                                                                                                                                                                                                                         | Bedridden individuals, pregnant women, participants with missing both or either serum creatinine or urine albumin-to- creatinine ratio data and participants on dialysis. | 44.9 (13.5) | 46.8% | 39.90 | 46.97 |

|   |                                        |                 |           |           |     |        |                                                                                                                                                                                                                                                                                                                                                                                                                                                                                                                   |                                                                                                                                                                          |             |       |       |       |
|---|----------------------------------------|-----------------|-----------|-----------|-----|--------|-------------------------------------------------------------------------------------------------------------------------------------------------------------------------------------------------------------------------------------------------------------------------------------------------------------------------------------------------------------------------------------------------------------------------------------------------------------------------------------------------------------------|--------------------------------------------------------------------------------------------------------------------------------------------------------------------------|-------------|-------|-------|-------|
|   |                                        |                 |           |           |     |        | was related to the household head and ate at least 3 meals in a week with the family. Households were defined as “a group of people who live together, usually pool their income and eat at least one meal together a day when they are at home. This does not include people who have migrated permanently or are considered visitors”                                                                                                                                                                           |                                                                                                                                                                          |             |       |       |       |
| 2 | Bradshaw, 2019 - Model 3b (derivation) | Cross-sectional | Community | 2015      | n/a | Random | Any individual aged ≥20 years and permanently residing in at Delhi and Chennai (CARRS-II). A permanent resident was defined as a person living in the selected household, was related to the household head and ate at least 3 meals in a week with the family. Households were defined as “a group of people who live together, usually pool their income and eat at least one meal together a day when they are at home. This does not include people who have migrated permanently or are considered visitors” | Bedridden individuals, pregnant women, participants with missing both or either serum creatinine or urine albumin-to-creatinine ratio data and participants on dialysis. | 44.9 (13.5) | 46.8% | 39.90 | 46.97 |
| 2 | Bradshaw, 2019 - Model                 | Cross-sectional | Community | 2010-2012 | n/a | Random | Any individual aged ≥20 years and permanently residing in at Delhi                                                                                                                                                                                                                                                                                                                                                                                                                                                | Bedridden individuals, pregnant women, participants with missing                                                                                                         | NI          | NI    | 47.20 | 38.00 |

|   |                                                   |                 |           |           |     |        |                                                                                                                                                                                                                                                                                                                                                                                                                                   |                                                                                                                                                                                                                                                                                  |             |       |       |       |
|---|---------------------------------------------------|-----------------|-----------|-----------|-----|--------|-----------------------------------------------------------------------------------------------------------------------------------------------------------------------------------------------------------------------------------------------------------------------------------------------------------------------------------------------------------------------------------------------------------------------------------|----------------------------------------------------------------------------------------------------------------------------------------------------------------------------------------------------------------------------------------------------------------------------------|-------------|-------|-------|-------|
|   | 3a<br>(CARRS-I urban validation)                  |                 |           |           |     |        | (CARRS-I). A permanent resident was defined as a person living in the selected household, was related to the household head and ate at least 3 meals in a week with the family. Households were defined as "a group of people who live together, usually pool their income and eat at least one meal together a day when they are at home. This does not include people who have migrated permanently or are considered visitors" | both or either serum creatinine or urine albumin-to-creatinine ratio data and participants on dialysis.                                                                                                                                                                          |             |       |       |       |
| 2 | Bradshaw, 2019 - Model 3a (UDAY rural validation) | Cross-sectional | Community | 2014      | n/a | Random | UDAY cohort participants ((a) adults aged ≥30 years residing in the sampled urban and rural areas of Sonipat and Vizag, respectively; and (b) willing to participate and provide informed consent).                                                                                                                                                                                                                               | Participants with missing both or either serum creatinine or urine albumin-to-creatinine ratio data, unwilling to provide informed consent, with serious chronic illnesses [such as that of the liver (cirrhosis), kidneys (renal failure) or malignancies], and pregnant women. | NI          | NI    | 47.20 | 38.00 |
| 3 | Carrillo-Larco, 2017 - CRONI CAS-CKD (derivation) | Cross-sectional | Community | 2013-2014 | n/a | Random | Full time resident, capable of giving informed consent, one subject per household.                                                                                                                                                                                                                                                                                                                                                | Being pregnant, having active pulmonary tuberculosis, and having any disability preventing from undergoing anthropometric assessments, having CKD, missing values in the prediction variables, missing                                                                           | 57.7 (12.4) | 49.4% |       |       |

|   |                                                            |                 |           |           |     |        |                                                                                    |                                                                                                                                                                                                                                                                                                                            |             |       |  |  |
|---|------------------------------------------------------------|-----------------|-----------|-----------|-----|--------|------------------------------------------------------------------------------------|----------------------------------------------------------------------------------------------------------------------------------------------------------------------------------------------------------------------------------------------------------------------------------------------------------------------------|-------------|-------|--|--|
|   | complete)                                                  |                 |           |           |     |        |                                                                                    | values in key variables to calculate eGFR, subjects with BMI >40 kg/m <sup>2</sup> or BMI <18.5 kg/m <sup>2</sup> .                                                                                                                                                                                                        |             |       |  |  |
| 3 | Carrillo-Larco, 2017 - CRONI CAS-CKD (derivation lab-free) | Cross-sectional | Community | 2013-2014 | n/a | Random | Full time resident, capable of giving informed consent, one subject per household. | Being pregnant, having active pulmonary tuberculosis, and having any disability preventing from undergoing anthropometric assessments, having CKD, missing values in the prediction variables, missing values in key variables to calculate eGFR, subjects with BMI >40 kg/m <sup>2</sup> or BMI <18.5 kg/m <sup>2</sup> . | 57.7 (12.4) | 49.4% |  |  |
| 3 | Carrillo-Larco, 2017 - CRONI CAS-CKD (validation complete) | Cross-sectional | Community | 2004-2006 | n/a | Random | PREVENCIÓN cohort participants.                                                    | Report having CKD, missing values in key variables to calculate eGFR, subjects with BMI >40 kg/m <sup>2</sup> or BMI <18.5 kg/m <sup>2</sup> , age < 35 years, missing values in prediction variables.                                                                                                                     | 57.1 (12.6) | 47.7% |  |  |
| 3 | Carrillo-Larco, 2017 - CRONI CAS-CKD (validation lab-free) | Cross-sectional | Community | 2004-2006 | n/a | Random | PREVENCIÓN cohort participants.                                                    | Report having CKD, missing values in key variables to calculate eGFR, subjects with BMI >40 kg/m <sup>2</sup> or BMI <18.5 kg/m <sup>2</sup> , age < 35 years, missing values in prediction variables.                                                                                                                     | 57.1 (12.6) | 47.7% |  |  |
| 4 | Mogueo, 2015 -                                             | Cross-sectional | Community | 2008-2011 | n/a | Random | Cape Town Bellville-South study cohort participants.                               | Participants with missing data on all variables, except                                                                                                                                                                                                                                                                    | 55 (15)     | 23.4% |  |  |

|   |                                                               |                 |           |           |      |        |                                                                                                               |                                                                                                |            |       |  |  |
|---|---------------------------------------------------------------|-----------------|-----------|-----------|------|--------|---------------------------------------------------------------------------------------------------------------|------------------------------------------------------------------------------------------------|------------|-------|--|--|
|   | Korean model (eGFR validation)                                |                 |           |           |      |        |                                                                                                               | anaemia                                                                                        |            |       |  |  |
| 4 | Mogueo , 2015 - Thai model (eGFR validation)                  | Cross-sectional | Community | 2008-2011 | n/a  | Random | Cape Town Bellville-South study cohort participants.                                                          | Participants with missing data on all variables, except kidney stones                          | 55 (15)    | 23.4% |  |  |
| 4 | Mogueo , 2015 - Korean model (eGFR or proteinuria validation) | Cross-sectional | Community | 2008-2011 | n/a  | Random | Cape Town Bellville-South study cohort participants.                                                          | Participants with missing data on all variables, except anaemia                                | 55 (15)    | 23.4% |  |  |
| 4 | Mogueo , 2015 - Thai model (eGFR or proteinuria validation)   | Cross-sectional | Community | 2008-2011 | n/a  | Random | Cape Town Bellville-South study cohort participants.                                                          | Participants with missing data on all variables, except kidney stones                          | 55 (15)    | 23.4% |  |  |
| 5 | Saranburt, 2017 - Framingham Heart                            | Cohort          | Community | 2002      | 2012 | Random | Employees of the Electric Generating Authority of Thailand (EGAT) who participated in a health survey in 2002 | Subjects who had CKD at baseline or did not have serum creatinine at baseline or at follow-up. | 54.6 (5.6) | 70.8% |  |  |

|   |                                                                |        |           |           |           |        |                                                                                                                                                                                                                                        |                                                                                                                                                                                       |            |       |  |  |
|---|----------------------------------------------------------------|--------|-----------|-----------|-----------|--------|----------------------------------------------------------------------------------------------------------------------------------------------------------------------------------------------------------------------------------------|---------------------------------------------------------------------------------------------------------------------------------------------------------------------------------------|------------|-------|--|--|
|   | Study (MDRD validation)                                        |        |           |           |           |        |                                                                                                                                                                                                                                        |                                                                                                                                                                                       |            |       |  |  |
| 5 | Saranburut, 2017 - Framingham Heart Study (CKD-EPI validation) | Cohort | Community | 2002      | 2012      | Random | Employees of the Electric Generating Authority of Thailand (EGAT) who participated in a health survey in 2003                                                                                                                          | Subjects who had CKD at baseline or did not have serum creatinine at baseline or at follow-up.                                                                                        | 54.7 (5.7) | 71.5% |  |  |
| 6 | Saranburut, 2017 - Model 1 (derivation Clinical only)          | Cohort | Community | 2002-2003 | 2012-2013 | Random | EGAT 1-2 cohort participants with preserved GFR (estimated glomerular filtration rate (eGFR) $\geq 60$ mL/min/1.73m <sup>2</sup> ) at baseline who attended both the examinations (EGAT 1 5rd examination and EGAT 2 4nd examination). | Patients who died, retired, moved, did not want to participate or had with missing baseline serum creatinine data. Also, patients with eGFR<60 at baseline in 2002-2003 were excluded | 51.3 (7.4) | 70.5% |  |  |
| 6 | Saranburut, 2017 - Model 1 BMI (derivation Clinical only)      | Cohort | Community | 2002-2003 | 2012-2013 | Random | EGAT 1-2 cohort participants with preserved GFR (estimated glomerular filtration rate (eGFR) $\geq 60$ mL/min/1.73m <sup>2</sup> ) at baseline who attended both the examinations (EGAT 1 5rd examination and EGAT 2 4nd examination). | Patients who died, retired, moved, did not want to participate or had with missing baseline serum creatinine data. Also, patients with eGFR<60 at baseline in 2002-2003 were excluded | 51.3 (7.4) | 70.5% |  |  |



|   |                                                                             |        |           |           |           |        |                                                                                                                                                                                                                                       |                                                                                                                                                                                             |            |       |  |  |
|---|-----------------------------------------------------------------------------|--------|-----------|-----------|-----------|--------|---------------------------------------------------------------------------------------------------------------------------------------------------------------------------------------------------------------------------------------|---------------------------------------------------------------------------------------------------------------------------------------------------------------------------------------------|------------|-------|--|--|
| 6 | Saranburut, 2017 - Model 2 (derivation Clinical + Limited laboratory tests) | Cohort | Community | 2002-2003 | 2012-2013 | Random | EGAT 1-2 cohort participants with preserved GFR (estimate glomerular filtration rate (eGFR) $\geq 60$ mL/min/1.73m <sup>2</sup> ) at baseline who attended both the examinations (EGAT 1 5rd examination and EGAT 2 4nd examination). | Patients who died, retired, moved, did not want to participate or had with missing baseline serum creatinine data. Also, patients with eGFR<60 at baseline in 2002-2003 were excluded       | 51.3 (7.4) | 70.5% |  |  |
| 6 | Saranburut, 2017 - Model 3 (derivation Clinical + Full laboratory tests)    | Cohort | Community | 2002-2003 | 2012-2013 | Random | EGAT 1-2 cohort participants with preserved GFR (estimate glomerular filtration rate (eGFR) $\geq 60$ mL/min/1.73m <sup>2</sup> ) at baseline who attended both the examinations (EGAT 1 5rd examination and EGAT 2 4nd examination). | Patients who died, retired, moved, did not want to participate or had with missing baseline serum creatinine data. Also, patients with eGFR<60 at baseline in 2002-2003 were excluded       | 51.3 (7.4) | 70.5% |  |  |
| 6 | Saranburut, 2017 - Model 1 (validation Clinical only)                       | Cohort | Community | 2009      | 2014      | Random | EGAT 3 cohort participants with preserved GFR (eGFR $\geq 60$ ) at baseline in 2009 (EGAT 3 1st examination) who were followed up 5 years later in 2014 (EGAT 3 2nd examination).                                                     | Participants younger than 40 years old at baseline, with missing serum creatinine values, parrients who died, retired and moved, unwilling to participate and with an eGFR <60 at baseline. | 45.6 (4.2) | 75.5% |  |  |
| 6 | Saranburut, 2017 - Model 2 (validation Clinical + )                         | Cohort | Community | 2009      | 2014      | Random | EGAT 3 cohort participants with preserved GFR (eGFR $\geq 60$ ) at baseline in 2009 (EGAT 3 1st examination) who were followed up 5 years later in 2014 (EGAT 3 2nd examination).                                                     | Participants younger than 40 years old at baseline, with missing serum creatinine values, parrients who died, retired and moved, unwilling to participate and with an eGFR <60 at baseline. | 45.6 (4.2) | 75.5% |  |  |

|   |                                               |                 |            |           |           |        |                                                                                                                                                                                                                                                                                   |                                                                                                                                   |             |       |  |  |
|---|-----------------------------------------------|-----------------|------------|-----------|-----------|--------|-----------------------------------------------------------------------------------------------------------------------------------------------------------------------------------------------------------------------------------------------------------------------------------|-----------------------------------------------------------------------------------------------------------------------------------|-------------|-------|--|--|
|   | Limited laboratory tests)                     |                 |            |           |           |        |                                                                                                                                                                                                                                                                                   |                                                                                                                                   |             |       |  |  |
| 7 | Thakkin stian, 2011 (derivati on)             | Cross-sectional | Communit y | 2007-2008 | n/a       | Random | Global Screening and Early Evaluation of Kidney Disease (SEEK) study subjects: being 18 years or older, had no menstruation period for at least a week prior to the examination date if women, and whom were willing participants of the study and provided signed consent forms. | Subjects without blood or urine specimens.                                                                                        | 45.2 (0.79) | 45.5% |  |  |
| 8 | Wen, 2020 - Simple Risk Score (derivati on)   | Cohort          | Communit y | 2006-2007 | 2012-2013 | Random | Handan Eye Study (HES) participants (rural residents aged ≥30 years old living in Yongnian County).                                                                                                                                                                               | Subjects who were diagnosed with CKD, unwilling to participate, missing follow up data (eGFR or UACR).                            | 50 (10)     | 44.7% |  |  |
| 8 | Wen, 2020 - Best-fit Risk Score (derivati on) | Cohort          | Communit y | 2006-2007 | 2012-2013 | Random | Handan Eye Study (HES) participants (rural residents aged ≥30 years old living in Yongnian County).                                                                                                                                                                               | Subjects who were diagnosed with CKD, unwilling to participate, missing follow up data (eGFR or UACR).                            | 50 (10)     | 44.7% |  |  |
| 9 | Wu, 2016 (derivati on)                        | Cross-sectional | Communit y | 2012      | n/a       | Random | Adults older than 18 years and having given consent to this study.                                                                                                                                                                                                                | Participants without: age information; body mass index (BMI) information; blood pressure (BP) measurement; serum creatinine test. | 45.3 (14.3) | 56.7% |  |  |
| 9 | Wu, 2016                                      | Cross-sectional | Communit y | 2012      | n/a       | Random | Adults older than 18 years and having given consent to this study.                                                                                                                                                                                                                | Participants without: age information; body mass index (BMI) information;                                                         | 41.8 (11.7) | 63.7% |  |  |

|  |              |  |  |  |  |  |  |                                                         |  |  |  |  |
|--|--------------|--|--|--|--|--|--|---------------------------------------------------------|--|--|--|--|
|  | (validation) |  |  |  |  |  |  | blood pressure (BP) measurement; serum creatinine test. |  |  |  |  |
|--|--------------|--|--|--|--|--|--|---------------------------------------------------------|--|--|--|--|

**S3.2 Table:: Outcome**

|    |                                                                 | Outcome       |                                                                                                                         |                                           |                 |                                |                                  |
|----|-----------------------------------------------------------------|---------------|-------------------------------------------------------------------------------------------------------------------------|-------------------------------------------|-----------------|--------------------------------|----------------------------------|
| N° | Study                                                           | Outcome       | Outcome details                                                                                                         | Same outcome definition for all patients? | Blinded outcome | Predictors part of the outcome | Mean follow-up (years) (cohorts) |
| 1  | Asgari, 2020 European Risk Assessment tool (6-years validation) | CKD composite | CKD was defined as eGFR < 60 mL/min/1.73 m <sup>2</sup> , provided by the Modification of Diet in Renal Disease (MDRD). | Yes                                       | NI              | No                             | 6.2                              |
| 1  | Asgari, 2020 European Risk Assessment tool (9-years validation) | CKD composite | CKD was defined as eGFR < 60 mL/min/1.73 m <sup>2</sup> , provided by the Modification of Diet in Renal Disease (MDRD). | Yes                                       | NI              | No                             | 9.2                              |
| 2  | Bradshaw, 2019 - Model 1 (derivation)                           | CKD composite | CKD was defined as an eGFR rate <60 mL/min/1.73 m <sup>2</sup> (estimated by the CKD-EPI equation) or UACR ≥30 mg/g     | Yes                                       | NI              | No                             | 0                                |
| 2  | Bradshaw, 2019 - Model 2 (derivation)                           | CKD composite | CKD was defined as an eGFR rate <60 mL/min/1.73 m <sup>2</sup> (estimated by the CKD-EPI equation) or UACR ≥30 mg/g     | Yes                                       | NI              | No                             | 0                                |
| 2  | Bradshaw, 2019 - Model 3a (derivation)                          | CKD composite | CKD was defined as an eGFR rate <60 mL/min/1.73 m <sup>2</sup> (estimated by the CKD-EPI equation) or UACR ≥30 mg/g     | Yes                                       | NI              | No                             | 0                                |
| 2  | Bradshaw, 2019 - Model 3b (derivation)                          | CKD composite | CKD was defined as an eGFR rate <60 mL/min/1.73 m <sup>2</sup> (estimated by the CKD-EPI equation) or UACR ≥30 mg/g     | Yes                                       | NI              | No                             | 0                                |
| 2  | Bradshaw, 2019 - Model 3a                                       | CKD composite | CKD was defined as an eGFR rate <60 mL/min/1.73 m <sup>2</sup> (estimated by the CKD-EPI equation) or UACR ≥30 mg/g     | Yes                                       | NI              | No                             | 0                                |

|   |                                                           |               |                                                                                                                                                                                                                                    |     |     |    |   |
|---|-----------------------------------------------------------|---------------|------------------------------------------------------------------------------------------------------------------------------------------------------------------------------------------------------------------------------------|-----|-----|----|---|
|   | (CARRS-I urban validation)                                |               |                                                                                                                                                                                                                                    |     |     |    |   |
| 2 | Bradshaw, 2019 - Model 3a (UDAY rural validation)         | CKD composite | CKD was defined as an eGFR rate <60 mL/min/1.73 m <sup>2</sup> (estimated by the CKD-EPI equation) or UACR ≥30 mg/g                                                                                                                | Yes | NI  | No | 0 |
| 3 | Carrillo-Larco, 2017 - CRONICAS-CKD (derivation complete) | CKD composite | CKD defined as an eGFR <60 mL/min/1.73m <sup>2</sup> , using the MDRD (Modification of Diet in Renal Disease) formula, also known as CKD stage III                                                                                 | Yes | Yes | No | 0 |
| 3 | Carrillo-Larco, 2017 - CRONICAS-CKD (derivation lab-free) | CKD composite | CKD defined as an eGFR <60 mL/min/1.73m <sup>2</sup> , using the MDRD (Modification of Diet in Renal Disease) formula, also known as CKD stage III                                                                                 | Yes | Yes | No | 0 |
| 3 | Carrillo-Larco, 2017 - CRONICAS-CKD (validation complete) | CKD composite | CKD defined as an eGFR <60 mL/min/1.73m <sup>2</sup> , using the MDRD (Modification of Diet in Renal Disease) formula, also known as CKD stage III                                                                                 | Yes | Yes | No | 0 |
| 3 | Carrillo-Larco, 2017 - CRONICAS-CKD (validation lab-free) | CKD composite | CKD defined as an eGFR <60 mL/min/1.73m <sup>2</sup> , using the MDRD (Modification of Diet in Renal Disease) formula, also known as CKD stage III                                                                                 | Yes | Yes | No | 0 |
| 4 | Mogueo, 2015 - Korean model (eGFR validation)             | CKD composite | eGFR <60 ml/min/1.73 m <sup>2</sup> based on the 4-variable Modification of Diet in Renal Disease (MDRD) formula                                                                                                                   | Yes | NI  | No | 0 |
| 4 | Mogueo, 2015 - Thai model (eGFR validation)               | CKD composite | eGFR <60 ml/min/1.73 m <sup>2</sup> based on the 4-variable Modification of Diet in Renal Disease (MDRD) formula                                                                                                                   | Yes | NI  | No | 0 |
| 4 | Mogueo, 2015 - Korean model (eGFR or                      | CKD composite | eGFR <60 ml/min/1.73 m <sup>2</sup> based on the 4-variable Modification of Diet in Renal Disease (MDRD) formula and 'any nephropathy' including any of the stages I to V of the Kidney Disease: Improving Global Outcomes Chronic | Yes | NI  | No | 0 |

|   | proteinuria validation)                                                     |               | Kidney Disease (KDIGO) classification                                                                                                                                                                                                                                                                                                                                       |     |    |    |    |
|---|-----------------------------------------------------------------------------|---------------|-----------------------------------------------------------------------------------------------------------------------------------------------------------------------------------------------------------------------------------------------------------------------------------------------------------------------------------------------------------------------------|-----|----|----|----|
| 4 | Mogueo, 2015 - Thai model (eGFR or proteinuria validation)                  | CKD composite | eGFR <60 ml/min/1.73 m <sup>2</sup> based on the 4-variable Modification of Diet in Renal Disease (MDRD) formula and 'any nephropathy' including any of the stages I to V of the Kidney Disease: Improving Global Outcomes Chronic Kidney Disease (KDIGO) classification                                                                                                    | Yes | NI | No | 0  |
| 5 | Saranburut, 2017 - Framingham Heart Study (MDRD validation)                 | CKD composite | CKD was defined as estimate glomerular filtration rate (eGFR) <60 mL/min/1.73 m <sup>2</sup> using the Modification of Diet in Renal Disease (MDRD)                                                                                                                                                                                                                         | Yes | NI | No | 10 |
| 5 | Saranburut, 2017 - Framingham Heart Study (CKD-EPI validation)              | CKD composite | CKD defined as (eGFR) <60 mL/min/1.73 m <sup>2</sup> using the CKD-EPI equation.                                                                                                                                                                                                                                                                                            | Yes | NI | No | 10 |
| 6 | Saranburut, 2017 - Model 1 (derivation Clinical only)                       | CKD composite | Preserved GFR (eGFR ≥60) at baseline and subsequently developed decreased GFR (eGFR < 60 mL/min/1.73m <sup>2</sup> ) at the 10 year follow-up calculated according to two-level race variable Chronic Kidney Disease–Epidemiology Collaboration (CKDEPI) equation using the non-black coefficient. The outcome is a modification from the KDIGO definition of CKD stage 3-5 | Yes | NI | No | 10 |
| 6 | Saranburut, 2017 - Model 1 BMI (derivation Clinical only)                   | CKD composite | Preserved GFR (eGFR ≥60) at baseline and subsequently developed decreased GFR (eGFR < 60 mL/min/1.73m <sup>2</sup> ) at the 10 year follow-up calculated according to two-level race variable Chronic Kidney Disease–Epidemiology Collaboration (CKDEPI) equation using the non-black coefficient. The outcome is a modification from the KDIGO definition of CKD stage 3-5 | Yes | NI | No | 10 |
| 6 | Saranburut, 2017 - Model 2 (derivation Clinical + Limited laboratory tests) | CKD composite | Preserved GFR (eGFR ≥60) at baseline and subsequently developed decreased GFR (eGFR < 60 mL/min/1.73m <sup>2</sup> ) at the 10 year follow-up calculated according to two-level race variable Chronic Kidney Disease–Epidemiology Collaboration (CKDEPI) equation using the non-black                                                                                       | Yes | NI | No | 10 |

|   |                                                                             |               |                                                                                                                                                                                                                                                                                                                                                                                         |     |    |    |     |
|---|-----------------------------------------------------------------------------|---------------|-----------------------------------------------------------------------------------------------------------------------------------------------------------------------------------------------------------------------------------------------------------------------------------------------------------------------------------------------------------------------------------------|-----|----|----|-----|
|   |                                                                             |               | coefficient. The outcome is a modification from the KDIGO definition of CKD stage 3-5                                                                                                                                                                                                                                                                                                   |     |    |    |     |
| 6 | Saranburut, 2017 - Model 3 (derivation Clinical + Full laboratory tests)    | CKD composite | Preserved GFR (eGFR $\geq 60$ ) at baseline and subsequently developed decreased GFR (eGFR $< 60$ mL/min/1.73m <sup>2</sup> ) at the 10 year follow-up calculated according to two-level race variable Chronic Kidney Disease–Epidemiology Collaboration (CKDEPI) equation using the non-black coefficient. The outcome is a modification from the KDIGO definition of CKD stage 3-5    | Yes | NI | No | 10  |
| 6 | Saranburut, 2017 - Model 1 (validation Clinical only)                       | CKD composite | Preserved GFR (eGFR $\geq 60$ ) at baseline and subsequently developed decreased GFR (eGFR $< 60$ mL/min/1.73m <sup>2</sup> ) at the 10 year follow-up calculated according to two-level race variable Chronic Kidney Disease–Epidemiology Collaboration (CKDEPI) equation using the non-black coefficient. The outcome is a modification from the KDIGO definition of CKD stage 3-5    | Yes | NI | No | 5   |
| 6 | Saranburut, 2017 - Model 2 (validation Clinical + Limited laboratory tests) | CKD composite | Preserved GFR (eGFR $\geq 60$ ) at baseline and subsequently developed decreased GFR (eGFR $< 60$ mL/min/1.73m <sup>2</sup> ) at the 10 year follow-up calculated according to two-level race variable Chronic Kidney Disease–Epidemiology Collaboration (CKDEPI) equation using the non-black coefficient. The outcome is a modification from the KDIGO definition of CKD stage 3-5    | Yes | NI | No | 5   |
| 7 | Thakkinian, 2011 (derivation)                                               | CKD composite | CKD was defined as stage I & II if GFR $\geq 90$ and GFR 60-89 mL/min/1.73 m <sup>2</sup> with haematuria and/or albumin-creatinine ratio 30 mg/g or greater, stage III, IV, and V if the GFR of 30-59, 15-29, and $< 15$ mL/min/1.73 m <sup>2</sup> respectively, regardless of kidney damage. eGFR was calculated using the MDRD equation for IDMS traceable serum creatinine values. | Yes | NI | No | 0   |
| 8 | Wen, 2020 - Simple Risk Score (derivation)                                  | CKD composite | CKD was defined as an eGFR rate $< 60$ mL/min/1.73 m <sup>2</sup> ((assessed by the modified Chinese MDRD equation) or UACR $\geq 30$ mg/g                                                                                                                                                                                                                                              | Yes | NI | No | 5.6 |
| 8 | Wen, 2020 - Best-fit Risk Score (derivation)                                | CKD composite | CKD was defined as an eGFR rate $< 60$ mL/min/1.73 m <sup>2</sup> ((assessed by the modified Chinese MDRD equation) or UACR $\geq 30$ mg/g                                                                                                                                                                                                                                              | Yes | NI | No | 5.6 |

|   |                          |                  |                                                                                   |     |    |    |   |
|---|--------------------------|------------------|-----------------------------------------------------------------------------------|-----|----|----|---|
| 9 | Wu, 2016<br>(derivation) | CKD<br>composite | Reduced eGFR was defined as eGFR<60 mL/min/1.73 m2<br>using the CKD-EPI equation. | Yes | NI | No | 0 |
| 9 | Wu, 2016<br>(validation) | CKD<br>composite | Reduced eGFR was defined as eGFR<60 mL/min/1.73 m2<br>using the CKD-EPI equation. | Yes | NI | No | 0 |

CKD, chronic kidney disease; CKD-EPI, chronic kidney disease epidemiology collaboration; eGFR, estimated glomerular filtration rate; GFR, glomerular filtration rate; KDIGO, MDRD, modification of diet renal disease; n/a, not applicable; NI, no information; UACR, urinary albumin-to-creatinine ratio.



**S3.3 Table: Candidate predictors**

|    |                                                                 | Candidate Predictors           |                                         |                   |                                                                                                                                                                                              |                                                                                                                                                                                                                                                                                                                                                                                                                                                                                                                      |                                                                                                                                             |                      |
|----|-----------------------------------------------------------------|--------------------------------|-----------------------------------------|-------------------|----------------------------------------------------------------------------------------------------------------------------------------------------------------------------------------------|----------------------------------------------------------------------------------------------------------------------------------------------------------------------------------------------------------------------------------------------------------------------------------------------------------------------------------------------------------------------------------------------------------------------------------------------------------------------------------------------------------------------|---------------------------------------------------------------------------------------------------------------------------------------------|----------------------|
| N° | Study                                                           | Number of candidate predictors | Number of predictors in the final model | Predictors timing | List of predictors in the final model                                                                                                                                                        | Predictors definition                                                                                                                                                                                                                                                                                                                                                                                                                                                                                                | Predictors ascertainment                                                                                                                    | Predictors modelling |
| 1  | Asgari, 2020 European Risk Assessment tool (6-years validation) | n/a                            | 18                                      | NI                | Age; BMI (body mass index); waist circumference; use of antihypertensives; current smoking, parent and/or sibling with myocardial infarction or stroke; parent and/or sibling with diabetes. | Age (<45, ≥45 to <50, ≥50 to <55, ≥55 to <60, ≥60 to <65, ≥65 to <70, ≥70 to <75, ≥75 to <85); Body mass index (<25, ≥25 to <30, ≥30); Waist circumference [<94, ≥94 to <102, ≥102 (for men) and <80, ≥80 to <88, ≥88 (for women)]; use of antihypertensive medications; current smoking ('who smokes cigarettes daily or occasionally'); family history of cardiovascular disease (CVD) and/or diabetes (previously diagnosed CVD in first-degree male and female relatives aged < 55 and < 65 years, respectively) | BMI was calculated as weight (kg) divided by height (m <sup>2</sup> ). Data collected by trained interviewer using a standard questionnaire | n/a                  |
| 1  | Asgari, 2020 European Risk Assessment tool (9-years validation) | n/a                            | 18                                      | NI                | Age; BMI (body mass index); waist circumference; use of antihypertensives; current smoking, parent and/or sibling with myocardial infarction or stroke; parent and/or sibling with diabetes. | Age (<45, ≥45 to <50, ≥50 to <55, ≥55 to <60, ≥60 to <65, ≥65 to <70, ≥70 to <75, ≥75 to <85); Body mass index (<25, ≥25 to <30, ≥30); Waist circumference [<94, ≥94 to <102, ≥102 (for men) and <80, ≥80 to <88, ≥88 (for women)]; use of antihypertensive medications; current smoking ('who smokes cigarettes daily                                                                                                                                                                                               | BMI was calculated as weight (kg) divided by height (m <sup>2</sup> ). Data collected by trained interviewer using a standard questionnaire | n/a                  |

|   |                                        |    |    |    |    |                                                                                                                                                                                               |    |                                                                                                                                                                                                     |
|---|----------------------------------------|----|----|----|----|-----------------------------------------------------------------------------------------------------------------------------------------------------------------------------------------------|----|-----------------------------------------------------------------------------------------------------------------------------------------------------------------------------------------------------|
|   |                                        |    |    |    |    | or occasionally'); family history of cardiovascular disease (CVD) and/or diabetes (previously diagnosed CVD in first-degree male and female relatives aged < 55 and < 65 years, respectively) |    |                                                                                                                                                                                                     |
| 2 | Bradshaw, 2019 - Model 1 (derivation ) | 30 | NI | NI | NI | NI                                                                                                                                                                                            | NI | All continuous variables used cubic spline terms with knots placed at fixed quantiles of the predictor's marginal distribution, categorical variables were summarized using percentages and counts. |
| 2 | Bradshaw, 2019 - Model 2 (derivation ) | 23 | NI | NI | NI | NI                                                                                                                                                                                            | NI | All continuous variables used cubic spline terms with knots placed at fixed quantiles of the predictor's marginal                                                                                   |

|   |                                         |    |    |    |    |    |    |                                                                                                                                                                                                     |
|---|-----------------------------------------|----|----|----|----|----|----|-----------------------------------------------------------------------------------------------------------------------------------------------------------------------------------------------------|
|   |                                         |    |    |    |    |    |    | distribution, categorical variables were summarized using percentages and counts.                                                                                                                   |
| 2 | Bradshaw, 2019 - Model 3a (derivation ) | NI | NI | NI | NI | NI | NI | All continuous variables used cubic spline terms with knots placed at fixed quantiles of the predictor's marginal distribution, categorical variables were summarized using percentages and counts. |
| 2 | Bradshaw, 2019 - Model 3b (derivation ) | 8  | NI | NI | NI | NI | NI | All continuous variables used cubic spline terms with knots placed at fixed quantiles of the                                                                                                        |

|   |                                                            |     |    |    |                            |                                                                                                                                                                                                                    |                                                                                                                                                                                                                                                                                                                |                                                                                                        |
|---|------------------------------------------------------------|-----|----|----|----------------------------|--------------------------------------------------------------------------------------------------------------------------------------------------------------------------------------------------------------------|----------------------------------------------------------------------------------------------------------------------------------------------------------------------------------------------------------------------------------------------------------------------------------------------------------------|--------------------------------------------------------------------------------------------------------|
|   |                                                            |     |    |    |                            |                                                                                                                                                                                                                    |                                                                                                                                                                                                                                                                                                                | predictor's marginal distribution, categorical variables were summarized using percentages and counts. |
| 2 | Bradshaw, 2019 - Model 3a (CARRS-I urban validation)       | n/a | NI | NI | NI                         | NI                                                                                                                                                                                                                 | NI                                                                                                                                                                                                                                                                                                             | n/a                                                                                                    |
| 2 | Bradshaw, 2019 - Model 3a (UDAY rural validation)          | n/a | NI | NI | NI                         | NI                                                                                                                                                                                                                 | NI                                                                                                                                                                                                                                                                                                             | n/a                                                                                                    |
| 3 | Carrillo-Larco, 2017 - CRONICA S-CKD (derivation complete) | 36  | 7  | NI | Age; hypertension; anemia. | Age (< 50, 50-69, ≥ 70 years), hypertension (blood pressure ≥ 140/90 mmHg OR previous diagnosis of hypertension and currently under treatment) and anemia (haemoglobin < 13 g/dL if male and < 12 g/dL if female). | Age (information was collected by trained fieldworkers through face-to-face interviews), hypertension (blood pressure measurements were conducted according to the recommendations of the 7th Joint National Committee on the diagnosis and management of High Blood Pressure in adults (JNC-7), NI on anemia. | NI                                                                                                     |
| 3 | Carrillo-Larco, 2017 -                                     | 26  | 5  | NI | Age; hypertension.         | Age (< 50, 50-69, ≥ 70 years), hypertension (blood pressure ≥ 140/90 mmHg OR previous diagnosis of                                                                                                                 | Age (information was collected by trained fieldworkers through face-to-                                                                                                                                                                                                                                        | NI                                                                                                     |

|   |                                                            |     |   |    |                                                |                                                                                                                                                                                                                    |                                                                                                                                                                                                                                                                                                                |     |
|---|------------------------------------------------------------|-----|---|----|------------------------------------------------|--------------------------------------------------------------------------------------------------------------------------------------------------------------------------------------------------------------------|----------------------------------------------------------------------------------------------------------------------------------------------------------------------------------------------------------------------------------------------------------------------------------------------------------------|-----|
|   | CRONICA S-CKD (derivation lab-free)                        |     |   |    |                                                | hypertension and currently under treatment).                                                                                                                                                                       | face interviews), hypertension (blood pressure measurements were conducted according to the recommendations of the 7th Joint National Committee on the diagnosis and management of High Blood Pressure in adults (JNC-7), NI on anemia.                                                                        |     |
| 3 | Carrillo-Larco, 2017 - CRONICA S-CKD (validation complete) | n/a | 7 | NI | Age; hypertension; anemia.                     | Age (< 50, 50-69, ≥ 70 years), hypertension (blood pressure ≥ 140/90 mmHg OR previous diagnosis of hypertension and currently under treatment) and anemia (haemoglobin < 13 g/dL if male and < 12 g/dL if female). | Age (information was collected by trained fieldworkers through face-to-face interviews), hypertension (blood pressure measurements were conducted according to the recommendations of the 7th Joint National Committee on the diagnosis and management of High Blood Pressure in adults (JNC-7), NI on anemia. | n/a |
| 3 | Carrillo-Larco, 2017 - CRONICA S-CKD (validation lab-free) | n/a | 5 | NI | Age; hypertension.                             | Age (< 50, 50-69, ≥ 70 years), hypertension (blood pressure ≥ 140/90 mmHg OR previous diagnosis of hypertension and currently under treatment).                                                                    | Age (information was collected by trained fieldworkers through face-to-face interviews), hypertension (blood pressure measurements were conducted according to the recommendations of the 7th Joint National Committee on the diagnosis and management of High Blood Pressure in adults (JNC-7), NI on anemia. | n/a |
| 4 | Mogueo, 2015 -                                             | n/a | 8 | NI | Age; sex; diabetes mellitus; hypertension; use | Age (50-59, 60-69, ≥70); Female gender; Hypertension (history of                                                                                                                                                   | Participants received a standardized interview (Age                                                                                                                                                                                                                                                            | NI  |

|   |                                             |     |   |    |                                                                        |                                                                                                                                                                                                                                                                                                                |                                                                                                                                                                                                                                                                                                                                                                                                                                                       |    |
|---|---------------------------------------------|-----|---|----|------------------------------------------------------------------------|----------------------------------------------------------------------------------------------------------------------------------------------------------------------------------------------------------------------------------------------------------------------------------------------------------------|-------------------------------------------------------------------------------------------------------------------------------------------------------------------------------------------------------------------------------------------------------------------------------------------------------------------------------------------------------------------------------------------------------------------------------------------------------|----|
|   | Korean model (eGFR validation)              |     |   |    | of statins; proteinuria                                                | illness, taking antihyper-tensive drug(s) or had systolic blood pressure $\geq 140$ mmHg or diastolic blood pressure $\geq 90$ mmHg; Diabetes (history of illness, taking oral hypoglycaemic agents or fasting plasma glucose levels $\geq 126$ mg/dL); Use of statins; Proteinuria                            | and sex) and physical examination during which blood pressure was measured according to the World Health Organisation (WHO) guidelines using a semi-automated digital blood pressure monitor (Rossmax PA, USA) on the right arm in the sitting position. Participants with no history of doctor diagnosed diabetes mellitus underwent a 75 g oral glucose tolerance test (OGTT) as recommended by the WHO                                             |    |
| 4 | Mogueo, 2015 - Thai model (eGFR validation) | n/a | 8 | NI | Age; diabetes mellitus; hypertension                                   | Age (<40, 40-59, 60-69, >70); Hypertension (history of illness, taking antihyper-tensive drug(s) or had systolic blood pressure $\geq 140$ mmHg or diastolic blood pressure $\geq 90$ mmHg); Diabetes (history of illness, taking oral hypoglycaemic agents or fasting plasma glucose levels $\geq 126$ mg/dL) | Participants received a standardized interview (Age) and physical examination during which blood pressure was measured according to the World Health Organisation (WHO) guidelines using a semi-automated digital blood pressure monitor (Rossmax PA, USA) on the right arm in the sitting position. Participants with no history of doctor diagnosed diabetes mellitus underwent a 75 g oral glucose tolerance test (OGTT) as recommended by the WHO | NI |
| 4 | Mogueo, 2015 - Korean model (eGFR or        | n/a | 8 | NI | Age; sex; diabetes mellitus; hypertension; use of statins; proteinuria | Age (50-59, 60-69, $\geq 70$ ); Female gender; Hypertension (history of illness, taking antihyper-tensive drug(s) or had systolic blood pressure $\geq 140$ mmHg or diastolic blood pressure                                                                                                                   | Participants received a standardized interview (Age and sex) and physical examination during which blood pressure was measured                                                                                                                                                                                                                                                                                                                        | NI |

|   |                                                             |     |   |    |                                                |                                                                                                                                                                                                                                                                                             |                                                                                                                                                                                                                                                                                                                                                                                                                                                       |     |
|---|-------------------------------------------------------------|-----|---|----|------------------------------------------------|---------------------------------------------------------------------------------------------------------------------------------------------------------------------------------------------------------------------------------------------------------------------------------------------|-------------------------------------------------------------------------------------------------------------------------------------------------------------------------------------------------------------------------------------------------------------------------------------------------------------------------------------------------------------------------------------------------------------------------------------------------------|-----|
|   | proteinuria validation)                                     |     |   |    |                                                | ≥90 mmHg); Diabetes (history of illness, taking oral hypoglycaemic agents or fasting plasma glucose levels ≥126 mg/dL); Use of statins; Proteinuria                                                                                                                                         | according to the World Health Organisation (WHO) guidelines using a semi-automated digital blood pressure monitor (Rossmax PA, USA) on the right arm in the sitting position. Participants with no history of doctor diagnosed diabetes mellitus underwent a 75 g oral glucose tolerance test (OGTT) as recommended by the WHO                                                                                                                        |     |
| 4 | Mogueo, 2015 - Thai model (eGFR or proteinuria validation)  | n/a | 8 | NI | Age; diabetes mellitus; hypertension           | Age (<40, 40-59, 60-69, >70); Hypertension (history of illness, taking antihypertensive drug(s) or had systolic blood pressure ≥140 mmHg or diastolic blood pressure ≥90 mmHg); Diabetes (history of illness, taking oral hypoglycaemic agents or fasting plasma glucose levels ≥126 mg/dL) | Participants received a standardized interview (Age) and physical examination during which blood pressure was measured according to the World Health Organisation (WHO) guidelines using a semi-automated digital blood pressure monitor (Rossmax PA, USA) on the right arm in the sitting position. Participants with no history of doctor diagnosed diabetes mellitus underwent a 75 g oral glucose tolerance test (OGTT) as recommended by the WHO | NI  |
| 5 | Saranburut, 2017 - Framingham Heart Study (MDRD validation) | n/a | 5 | NI | Diabetes mellitus; hypertension; eGFR category | Diabetes mellitus (yes); hypertension (yes); eGFR category (60-74, 75-89, 90-119)                                                                                                                                                                                                           | Hypertension was defined as systolic blood pressure ≥ 140 mmHg or diastolic blood pressure ≥ 90 mmHg or use of oral antihypertensive medication. Diabetes mellitus was defined as a fasting glucose of ≥126 mg/dl or use                                                                                                                                                                                                                              | n/a |

|   |                                                                 |     |    |    |                                                                             |                                                                                                                                                                                                                                                                         |                                                                                                                                                                                                                                                                                                                                                                                                     |     |
|---|-----------------------------------------------------------------|-----|----|----|-----------------------------------------------------------------------------|-------------------------------------------------------------------------------------------------------------------------------------------------------------------------------------------------------------------------------------------------------------------------|-----------------------------------------------------------------------------------------------------------------------------------------------------------------------------------------------------------------------------------------------------------------------------------------------------------------------------------------------------------------------------------------------------|-----|
|   |                                                                 |     |    |    |                                                                             |                                                                                                                                                                                                                                                                         | of medications. eGFR was estimated using the Modification of Diet in Renal Disease (MDRD) equation.                                                                                                                                                                                                                                                                                                 |     |
| 5 | Saranburu t, 2017 - Framingham Heart Study (CKD-EPI validation) | n/a | 16 | NI | Age; diabetes mellitus; hypertension; eGFR category                         | Age (30-34, 35-39, 40-44, 45-49, 50-54, 55-59, 60-64, 65-69, 70-74, 75-79, 80-85); diabetes mellitus (yes); hypertension (yes); eGFR category (60-74, 75-89, 90-119)                                                                                                    | Age was obtained by a survey. Hypertension was defined as systolic blood pressure $\geq 140$ mmHg or diastolic blood pressure $\geq 90$ mmHg or use of oral antihypertensive medication. Diabetes mellitus was defined as a fasting glucose of $\geq 126$ mg/dl or use of medications. eGFR was estimated using the chronic kidney disease-epidemiology collaboration (CKD-EPI) equation            | n/a |
| 6 | Saranburu t, 2017 - Model 1 (derivation Clinical only)          | 15  | 15 | NI | Age; sex; systolic blood pressure; waist circumference; diabetes mellitus   | Age (<45, 45-54, 55-59, $\geq 55$ ); Sex (male, female); Waist circumference ( $\leq 80$ for male or $\leq 90$ for female or $> 80$ for female or $> 90$ for male); Diabetes (yes, no); Systolic blood pressure (<120, 120-129, 130-139, 140-149, 150-159, $\geq 160$ ) | Age (health survey), sex (health survey). Hypertension was defined as systolic blood pressure $\geq 140$ mmHg or diastolic blood pressure $\geq 90$ mmHg or use of oral antihypertensive medication. Diabetes mellitus was defined as a fasting glucose of $\geq 126$ mg/dl or a positive history of diabetes. Waist circumference was measured midway between the lowest ribs and the iliac crest. | NI  |
| 6 | Saranburu t, 2017 - Model 1 BMI (derivation)                    | 15  | 15 | NI | Age; sex; systolic blood pressure; body mass index (BMI); diabetes mellitus | Age (<45, 45-54, 55-59, $\geq 55$ ); Sex (male, female); BMI (<25, $\geq 25$ ); Diabetes (yes, no); Systolic blood pressure (<120, 120-129, 130-139, 140-149, 150-159, $\geq 160$ )                                                                                     | Age (health survey), sex (health survey). Hypertension was defined as systolic blood pressure $\geq 140$ mmHg or diastolic blood pressure $\geq 90$ mmHg or use of oral                                                                                                                                                                                                                             | NI  |



|   |                                                                             |    |    |    |                                                                                                                     |                                                                                                                                                                                                                                                   |                                                                                                                                                                                                                                                                                                                                                                                                                                                                                                                                                                                                                                                                             |    |
|---|-----------------------------------------------------------------------------|----|----|----|---------------------------------------------------------------------------------------------------------------------|---------------------------------------------------------------------------------------------------------------------------------------------------------------------------------------------------------------------------------------------------|-----------------------------------------------------------------------------------------------------------------------------------------------------------------------------------------------------------------------------------------------------------------------------------------------------------------------------------------------------------------------------------------------------------------------------------------------------------------------------------------------------------------------------------------------------------------------------------------------------------------------------------------------------------------------------|----|
|   | Clinical only)                                                              |    |    |    |                                                                                                                     |                                                                                                                                                                                                                                                   | antihypertensive medication. Diabetes mellitus was defined as a fasting glucose of $\geq 126$ mg/dl or a positive history of diabetes. Body mass index was defined as weight in kilograms divided by the square of height in meters                                                                                                                                                                                                                                                                                                                                                                                                                                         |    |
| 6 | Saranburut, 2017 - Model 2 (derivation Clinical + Limited laboratory tests) | 16 | 16 | NI | Age; sex; systolic blood pressure; diabetes mellitus; glomerular filtration rate at baseline                        | Age (<45, 45-54, 55-59, $\geq 55$ ); Sex (male, female); Diabetes (yes, no); Systolic blood pressure (<120, 120-129, 130-139, 140-149, 150-159, $\geq 160$ ); eGFR ( $\geq 90$ , 75-89, 60-74)                                                    | Age (health survey), sex (health survey). Hypertension was defined as systolic blood pressure $\geq 140$ mmHg or diastolic blood pressure $\geq 90$ mmHg or use of oral antihypertensive medication. Diabetes mellitus was defined as a fasting glucose of $\geq 126$ mg/dl or a positive history of diabetes. Serum creatinine (sCr) was measured by the enzymatic assay on the Vitros 350 analyzer (Ortho-Clinical Diagnostics, USA) using IDMS-Standard Reference Material (SRM) 967 as the standard. Estimate glomerular filtration rate (eGFR) was calculated according to two-level race variable Chronic Kidney Disease–Epidemiology Collaboration (CKDEPI) equation | NI |
| 6 | Saranburut, 2017 - Model 3 (derivation Clinical + Full                      | 22 | 20 | NI | Age; sex; systolic blood pressure; diabetes mellitus; glomerular filtration rate at baseline; uric acid; hemoglobin | Age (<45, 45-54, 55-59, $\geq 55$ ); Sex (male, female); Diabetes (yes, no); Systolic blood pressure (<120, 120-129, 130-139, 140-149, 150-159, $\geq 160$ ); eGFR ( $\geq 90$ , 75-89, 60-74); Uric acid (>6 for female or >7 for male, $\leq 6$ | Age (health survey), sex (health survey). Hypertension was defined as systolic blood pressure $\geq 140$ mmHg or diastolic blood pressure $\geq 90$ mmHg or use of oral                                                                                                                                                                                                                                                                                                                                                                                                                                                                                                     | NI |

|   |                                                       |     |    |    |                                                                                              |                                                                                                                                                                                                                                                                           |                                                                                                                                                                                                                                                                                                                                                                                                                                                                                                                                                             |     |
|---|-------------------------------------------------------|-----|----|----|----------------------------------------------------------------------------------------------|---------------------------------------------------------------------------------------------------------------------------------------------------------------------------------------------------------------------------------------------------------------------------|-------------------------------------------------------------------------------------------------------------------------------------------------------------------------------------------------------------------------------------------------------------------------------------------------------------------------------------------------------------------------------------------------------------------------------------------------------------------------------------------------------------------------------------------------------------|-----|
|   | laboratory tests)                                     |     |    |    |                                                                                              | for female or $\leq 7$ for male); Hemoglobin ( $<12$ for female or $<13$ for male, $\geq 12$ for female or $\geq 13$ for male)                                                                                                                                            | antihypertensive medication. Diabetes mellitus was defined as a fasting glucose of $\geq 126$ mg/dl or a positive history of diabetes. Serum creatinine (sCr) was measured by the enzymatic assay on the Vitros 350 analyzer (Ortho-Clinical Diagnostics, USA) using IDMS-Standard Reference Material (SRM) 967 as the standard. Estimate glomerular filtration rate (eGFR) was calculated according to two-level race variable Chronic Kidney Disease–Epidemiology Collaboration (CKDEPI) equation. There is no information about uric acid and hemoglobin |     |
| 6 | Saranburut, 2017 - Model 1 (validation Clinical only) | n/a | 15 | NI | Age; sex; systolic blood pressure; waist circumference; diabetes mellitus                    | Age ( $<45$ , 45-54, 55-59, $\geq 55$ ); Sex (male, female); Waist circumference ( $\leq 80$ for male or $\leq 90$ for male, $>80$ for female or $>90$ for male); Diabetes (yes, no); Systolic blood pressure ( $<120$ , 120-129, 130-139, 140-149, 150-159, $\geq 160$ ) | Age (health survey), sex (health survey). Hypertension was defined as systolic blood pressure $\geq 140$ mmHg or diastolic blood pressure $\geq 90$ mmHg or use of oral antihypertensive medication. Diabetes mellitus was defined as a fasting glucose of $\geq 126$ mg/dl or a positive history of diabetes. Waist circumference was measured midway between the lowest ribs and the iliac crest.                                                                                                                                                         | n/a |
| 6 | Saranburut, 2017 - Model 2 (validation                | n/a | 16 | NI | Age; sex; systolic blood pressure; diabetes mellitus; glomerular filtration rate at baseline | Age ( $<45$ , 45-54, 55-59, $\geq 55$ ); Sex (male, female); Diabetes (yes, no); Systolic blood pressure ( $<120$ , 120-129, 130-139, 140-149, 150-159,                                                                                                                   | Age (health survey), sex (health survey). Hypertension was defined as systolic blood pressure $\geq 140$ mmHg or                                                                                                                                                                                                                                                                                                                                                                                                                                            | n/a |

|   |                                            |    |    |              |                                                                        |                                                                                                                                                                                                                                                                                                                           |                                                                                                                                                                                                                                                                                                                                                                                                                                                                                                                                                 |    |
|---|--------------------------------------------|----|----|--------------|------------------------------------------------------------------------|---------------------------------------------------------------------------------------------------------------------------------------------------------------------------------------------------------------------------------------------------------------------------------------------------------------------------|-------------------------------------------------------------------------------------------------------------------------------------------------------------------------------------------------------------------------------------------------------------------------------------------------------------------------------------------------------------------------------------------------------------------------------------------------------------------------------------------------------------------------------------------------|----|
|   | Clinical + Limited laboratory tests)       |    |    |              |                                                                        | ≥160); eGFR (≥90, 75-89, 60-74)                                                                                                                                                                                                                                                                                           | diastolic blood pressure ≥ 90 mmHg or use of oral antihypertensive medication. Diabetes mellitus was defined as a fasting glucose of ≥126 mg/dl or a positive history of diabetes. Serum creatinine (sCr) was measured by the enzymatic assay on the Vitros 350 analyzer (Ortho-Clinical Diagnostics, USA) using IDMS-Standard Reference Material (SRM) 967 as the standard. Estimate glomerular filtration rate (eGFR) was calculated according to two-level race variable Chronic Kidney Disease–Epidemiology Collaboration (CKDEPI) equation |    |
| 7 | Thakkinstian, 2011 (derivation)            | 37 | 10 | NI           | Age; history of kidney stones; diabetes mellitus; hypertension         | Age (<40, 40-59, 60-69, ≥70); Hypertension (taking antihyper-tensive drug(s) or had systolic blood pressure ≥140 mmHg or diastolic blood pressure ≥90 mmHg); Diabetes (taking oral hypoglycaemic agents or fasting plasma glucose levels ≥126 mg/dL); History of kidney stone was measured by self-reporting kidney stone | Age (survey), diabetes (history of illness, relevant medicines used or laboratory tests/physical examinations), hypertension (history of illness, relevant medicines used or laboratory tests/physical examinations), and history of kidney stones (self-reported in survey).                                                                                                                                                                                                                                                                   | NI |
| 8 | Wen, 2020 - Simple Risk Score (derivation) | NI | 15 | Time-varying | Waist circumference; systolic blood pressure; sex; education; diabetes | Waist circumference [<80/<75, 80-84.9/75-79.9, 85-89.9/80-84.9, 90-94.9/85-89.9, ≥95/≥90 (for male/female)]; systolic blood pressure (<120, 120-139, 140-159, >160); sex (male, female); education (illiterate, primary school and above); diabetes (no or yes)                                                           | During medical examinations, participants took two blood pressure measurements using a non-invasive automatic HEM-907 blood pressure monitor after 5 minutes of rest. Systolic blood pressure was identified as the                                                                                                                                                                                                                                                                                                                             | NI |

|   |                                              |    |    |              |                                                                                                                           |                                                                                                                                                                                                                                                                                            |                                                                                                                                                                                                                                                                                                                                                                                                                                                                                                                                                                                       |    |
|---|----------------------------------------------|----|----|--------------|---------------------------------------------------------------------------------------------------------------------------|--------------------------------------------------------------------------------------------------------------------------------------------------------------------------------------------------------------------------------------------------------------------------------------------|---------------------------------------------------------------------------------------------------------------------------------------------------------------------------------------------------------------------------------------------------------------------------------------------------------------------------------------------------------------------------------------------------------------------------------------------------------------------------------------------------------------------------------------------------------------------------------------|----|
|   |                                              |    |    |              |                                                                                                                           |                                                                                                                                                                                                                                                                                            | average values of two independent measurements; Diabetes was defined as: (1) FPG $\geq 7.0$ mmol/L, or (2) self-reported diagnosis of diabetes, or (3) the use of antidiabetic medications; According to the number of years of education, they were divided into four groups (illiterate for 0 years, primary school for 1–6 years, junior high school for 7–9 years, and senior high school for $\geq 10$ years); Sex was self-reported; Information about waist circumference was not available                                                                                    |    |
| 8 | Wen, 2020 - Best-fit Risk Score (derivation) | NI | 19 | Time-varying | Urinary Albumin-to-creatinine ratio; systolic blood pressure; C-reactive protein; triglycerides; sex; education; diabetes | Urinary Albumin-to-creatinine ratio (<5.0, 5.0-10.0, >10.0); systolic blood pressure (<120, 120-139, 140-159, >160); C-reactive protein (<1.0, 1-3, >3.0); triglycerides (<1.0, 1.0-1.7, >1.7); sex (male, female); education (illiterate, primary school and above); diabetes (no or yes) | Urinary albumin and creatinine were measured from fresh morning spot urine samples; During medical examinations, participants took two blood pressure measurements using a non-invasive automatic HEM-907 blood pressure monitor after 5 minutes of rest. Systolic blood pressure was identified as the average values of two independent measurements; Diabetes was defined as: (1) FPG $\geq 7.0$ mmol/L, or (2) self-reported diagnosis of diabetes, or (3) the use of antidiabetic medications; According to the number of years of education, they were divided into four groups | NI |

|   |                       |     |    |          |                                               |                                                                                                                                                                                       |                                                                                                                                                                                                                                                      |     |
|---|-----------------------|-----|----|----------|-----------------------------------------------|---------------------------------------------------------------------------------------------------------------------------------------------------------------------------------------|------------------------------------------------------------------------------------------------------------------------------------------------------------------------------------------------------------------------------------------------------|-----|
|   |                       |     |    |          |                                               |                                                                                                                                                                                       | (illiterate for 0 years, primary school for 1–6 years, junior high school for 7–9 years, and senior high school for ≥10 years); Sex was self-reported; Information about waist circumference, C-reactive protein and triglycerides were no available |     |
| 9 | Wu, 2016 (derivation) | NI  | 10 | Baseline | Age, gender and body mass index (BMI) status. | Age (≤ 40, 41–50, 51–60, 61–70, ≥71), gender (male, female) and body mass index (BMI) status (normal, overweight: 23–24.9 kg/m <sup>2</sup> , obesity: ≥25 kg/m <sup>2</sup> ).       | Age (self-reported), gender (self-reported) and body mass index (BMI) status (calculated from participant's measured body weight and height).                                                                                                        | NI  |
| 9 | Wu, 2016 (validation) | n/a | 10 | Baseline | Age, gender and body mass index (BMI) status. | Age (≤ 40, 41 – 50, 51 – 60, 61 – 70, 71+), gender (male, female) and body mass index (BMI) status (normal, overweight: 23–24.9 kg/m <sup>2</sup> , obesity: ≥25 kg/m <sup>2</sup> ). | Age (self-reported), gender (self-reported) and body mass index (BMI) status (calculated from participant's measured body weight and height).                                                                                                        | n/a |

**S3.4 Table: Sample size and missing data**

|    |                                                                             | Sample Size          |                          |                                               | Missing Data  |                                          |                                       |
|----|-----------------------------------------------------------------------------|----------------------|--------------------------|-----------------------------------------------|---------------|------------------------------------------|---------------------------------------|
| N° | Study                                                                       | Baseline sample size | Number of outcome events | Total outcome events per candidate predictors | Missing data  | Number of participants with missing data | Missing data per candidate predictors |
| 1  | Asgari, 2020 European Risk Assessment tool (6-years validation)             | 3270                 | 722                      | n/a                                           | Complete-case | 2817                                     | n/a                                   |
| 1  | Asgari, 2020 European Risk Assessment tool (9-years validation)             | 3240                 | 1359                     | n/a                                           | Complete-case | 2847                                     | n/a                                   |
| 2  | Bradshaw, 2019 - Model 1 (derivation)                                       | 8698                 | 947                      | 31,57                                         | Complete-case | 896                                      | 29,87                                 |
| 2  | Bradshaw, 2019 - Model 2 (derivation)                                       | 8698                 | 947                      | 41,17                                         | Complete-case | 896                                      | 38,96                                 |
| 2  | Bradshaw, 2019 - Model 3a (derivation)                                      | 8698                 | 947                      | NI                                            | Complete-case | 896                                      | NI                                    |
| 2  | Bradshaw, 2019 - Model 3b (derivation)                                      | 8698                 | 947                      | 118,38                                        | Complete-case | 896                                      | 112,00                                |
| 2  | Bradshaw, 2019 - Model 3a (CARRS-I urban validation)                        | 4065                 | NI                       | n/a                                           | Complete-case | 1300                                     | n/a                                   |
| 2  | Bradshaw, 2019 - Model 3a (UDAY rural validation)                           | 4940                 | NI                       | n/a                                           | Complete-case | 1233                                     | n/a                                   |
| 3  | Carrillo-Larco, 2017 - CRONICAS-CKD (derivation complete)                   | 2368                 | 81                       | 2,25                                          | Complete-case | 235                                      | 6,53                                  |
| 3  | Carrillo-Larco, 2017 - CRONICAS-CKD (derivation lab-free)                   | 2368                 | 81                       | 3,12                                          | Complete-case | 235                                      | 9,04                                  |
| 3  | Carrillo-Larco, 2017 - CRONICAS-CKD (validation complete)                   | 1459                 | 79                       | n/a                                           | Complete-case | 79                                       | n/a                                   |
| 3  | Carrillo-Larco, 2017 - CRONICAS-CKD (validation lab-free)                   | 1459                 | 79                       | n/a                                           | Complete-case | 79                                       | n/a                                   |
| 4  | Mogueo, 2015 - Korean model (eGFR validation)                               | 902                  | 259                      | n/a                                           | Complete-case | 383                                      | n/a                                   |
| 4  | Mogueo, 2015 - Thai model (eGFR validation)                                 | 902                  | 259                      | n/a                                           | Complete-case | 383                                      | n/a                                   |
| 4  | Mogueo, 2015 - Korean model (eGFR or proteinuria validation)                | 902                  | 268                      | n/a                                           | Complete-case | 383                                      | n/a                                   |
| 4  | Mogueo, 2015 - Thai model (eGFR or proteinuria validation)                  | 902                  | 268                      | n/a                                           | Complete-case | 383                                      | n/a                                   |
| 5  | Saranburut, 2017 - Framingham Heart Study (MDRD validation)                 | 2141                 | 222                      | n/a                                           | Complete-case | NI                                       | n/a                                   |
| 5  | Saranburut, 2017 - Framingham Heart Study (CKD-EPI validation)              | 2328                 | 233                      | n/a                                           | Complete-case | NI                                       | n/a                                   |
| 6  | Saranburut, 2017 - Model 1 (derivation Clinical only)                       | 3186                 | 271                      | 18,07                                         | Complete-case | NI                                       | NI                                    |
| 6  | Saranburut, 2017 - Model 1 BMI (derivation Clinical only)                   | 3186                 | 271                      | 18,07                                         | Complete-case | NI                                       | NI                                    |
| 6  | Saranburut, 2017 - Model 2 (derivation Clinical + Limited laboratory tests) | 3186                 | 271                      | 16,94                                         | Complete-case | NI                                       | NI                                    |
| 6  | Saranburut, 2017 - Model 3 (derivation Clinical + Full laboratory tests)    | 3186                 | 271                      | 12,32                                         | Complete-case | NI                                       | NI                                    |
| 6  | Saranburut, 2017 - Model 1 (validation Clinical only)                       | 1395                 | 27                       | n/a                                           | Complete-case | NI                                       | NI                                    |

|   |                                                                             |       |     |       |               |      |     |
|---|-----------------------------------------------------------------------------|-------|-----|-------|---------------|------|-----|
| 6 | Saranburut, 2017 - Model 2 (validation Clinical + Limited laboratory tests) | 1395  | 27  | n/a   | Complete-case | NI   | NI  |
| 7 | Thakkestian, 2011 (derivation)                                              | 3459  | 626 | 16,92 | NI            | NI   | NI  |
| 8 | Wen, 2020 - Simple Risk Score (derivation)                                  | 3266  | 590 | NI    | Complete-case | 992  | NI  |
| 8 | Wen, 2020 - Best-fit Risk Score (derivation)                                | 3266  | 590 | NI    | Complete-case | 992  | NI  |
| 9 | Wu, 2016 (derivation)                                                       | 14374 | 294 | NI    | Complete-case | 3135 | NI  |
| 9 | Wu, 2016 (validation)                                                       | 4371  | 48  | n/a   | Complete-case | 911  | n/a |

**S3.5 Table: Model development**

|    |                                                                 | Model Development |                                      |                      |                                                                          |                                                                                                        |                              |
|----|-----------------------------------------------------------------|-------------------|--------------------------------------|----------------------|--------------------------------------------------------------------------|--------------------------------------------------------------------------------------------------------|------------------------------|
| N° | Study                                                           | Regression method | Were the model assumptions verified? | Predictors selection | If the prediction model was a replication, which was the original model? | If there were pre-selection, describe the method                                                       | Was a shrinkage method used? |
| 1  | Asgari, 2020 European Risk Assessment tool (6-years validation) | n/a               | n/a                                  | n/a                  | n/a                                                                      | n/a                                                                                                    | n/a                          |
| 1  | Asgari, 2020 European Risk Assessment tool (9-years validation) | n/a               | n/a                                  | n/a                  | n/a                                                                      | n/a                                                                                                    | n/a                          |
| 2  | Bradshaw, 2019 - Model 1 (derivation)                           | Logistic          | NI                                   | Pre-selection        | n/a                                                                      | Step-down selection procedure based on the Akaike information criterion to select the final predictors | No                           |
| 2  | Bradshaw, 2019 - Model 2 (derivation)                           | Logistic          | NI                                   | Pre-selection        | n/a                                                                      | Step-down selection procedure based on the Akaike information criterion to select the final predictors | No                           |
| 2  | Bradshaw, 2019 - Model 3a (derivation)                          | Logistic          | NI                                   | Pre-selection        | n/a                                                                      | Step-down selection procedure based on the Akaike information criterion to select the final predictors | No                           |
| 2  | Bradshaw, 2019 - Model 3b (derivation)                          | Logistic          | NI                                   | Pre-selection        | n/a                                                                      | Step-down selection procedure based on the Akaike information criterion to select the final predictors | No                           |
| 2  | Bradshaw, 2019 - Model 3a (CARRS-I urban validation)            | n/a               | n/a                                  | n/a                  | n/a                                                                      | n/a                                                                                                    | n/a                          |
| 2  | Bradshaw, 2019 - Model 3a (UDAY rural validation)               | n/a               | n/a                                  | n/a                  | n/a                                                                      | n/a                                                                                                    | n/a                          |
| 3  | Carrillo-Larco, 2017 - CRONICAS-CKD (derivation complete)       | Logistic          | NI                                   | Pre-selection        | n/a                                                                      | Stepwise backward elimination method                                                                   | No                           |



|   |                                                                             |          |     |               |     |                                                                                                                                                  |     |
|---|-----------------------------------------------------------------------------|----------|-----|---------------|-----|--------------------------------------------------------------------------------------------------------------------------------------------------|-----|
| 3 | Carrillo-Larco, 2017 - CRONICAS-CKD (derivation lab-free)                   | Logistic | NI  | Pre-selection | n/a | Stepwise backward elimination method                                                                                                             | No  |
| 3 | Carrillo-Larco, 2017 - CRONICAS-CKD (validation complete)                   | n/a      | n/a | n/a           | n/a | n/a                                                                                                                                              | n/a |
| 3 | Carrillo-Larco, 2017 - CRONICAS-CKD (validation lab-free)                   | n/a      | n/a | n/a           | n/a | n/a                                                                                                                                              | n/a |
| 4 | Mogueo, 2015 - Korean model (eGFR validation)                               | n/a      | n/a | n/a           | n/a | n/a                                                                                                                                              | n/a |
| 4 | Mogueo, 2015 - Thai model (eGFR validation)                                 | n/a      | n/a | n/a           | n/a | n/a                                                                                                                                              | n/a |
| 4 | Mogueo, 2015 - Korean model (eGFR or proteinuria validation)                | n/a      | n/a | n/a           | n/a | n/a                                                                                                                                              | n/a |
| 4 | Mogueo, 2015 - Thai model (eGFR or proteinuria validation)                  | n/a      | n/a | n/a           | n/a | n/a                                                                                                                                              | n/a |
| 5 | Saranburut, 2017 - Framingham Heart Study (MDRD validation)                 | n/a      | n/a | n/a           | n/a | n/a                                                                                                                                              | n/a |
| 5 | Saranburut, 2017 - Framingham Heart Study (CKD-EPI validation)              | n/a      | n/a | n/a           | n/a | n/a                                                                                                                                              | n/a |
| 6 | Saranburut, 2017 - Model 1 (derivation Clinical only)                       | Logistic | NI  | Pre-selection | n/a | Variables were sequentially added in a pre-specified order and incorporated using a p< 0.05 threshold for entry and retention in the final model | No  |
| 6 | Saranburut, 2017 - Model 1 BMI (derivation Clinical only)                   | Logistic | NI  | Pre-selection | n/a | Variables were sequentially added in a pre-specified order and incorporated using a p< 0.05 threshold for entry and retention in the final model | No  |
| 6 | Saranburut, 2017 - Model 2 (derivation Clinical + Limited laboratory tests) | Logistic | NI  | Pre-selection | n/a | Variables were sequentially added in a pre-specified order and incorporated using a p< 0.05 threshold for entry and retention in the final model | No  |
| 6 | Saranburut, 2017 - Model 3 (derivation Clinical + Full laboratory tests)    | Logistic | NI  | Pre-selection | n/a | Variables were sequentially added in a pre-specified order and incorporated using a p< 0.05 threshold for entry and retention in the final model | No  |

|   |                                                                             |          |     |               |     |                                                                                                                                                                                                                                                                                                                                                                                                                                                                                          |     |
|---|-----------------------------------------------------------------------------|----------|-----|---------------|-----|------------------------------------------------------------------------------------------------------------------------------------------------------------------------------------------------------------------------------------------------------------------------------------------------------------------------------------------------------------------------------------------------------------------------------------------------------------------------------------------|-----|
| 6 | Saranburut, 2017 - Model 1 (validation Clinical only)                       | n/a      | n/a | n/a           | n/a | n/a                                                                                                                                                                                                                                                                                                                                                                                                                                                                                      | n/a |
| 6 | Saranburut, 2017 - Model 2 (validation Clinical + Limited laboratory tests) | n/a      | n/a | n/a           | n/a | n/a                                                                                                                                                                                                                                                                                                                                                                                                                                                                                      | n/a |
| 7 | Thakkinstian, 2011 (derivation)                                             | Logistic | NI  | Pre-selection | n/a | Factors with p values < 0.15 in a univariate analysis were considered to be simultaneously included in the multivariate logistic equation. Model selection was performed using F-tests, and thus only significant variables were kept in the final model. C statistic of models with and without a particular variable were then compared; if dropping that variable did not significantly reduce the explanation of the CKD, that variable was omitted in the final parsimonious model. | No  |
| 8 | Wen, 2020 - Simple Risk Score (derivation)                                  | Logistic | NI  | Pre-selection | n/a | Risk factors were investigated by forward stepwise logistic regression and only statistically significant (a two-sided P value <0.05) risk factors were retained.                                                                                                                                                                                                                                                                                                                        | No  |
| 8 | Wen, 2020 - Best-fit Risk Score (derivation)                                | Logistic | NI  | Pre-selection | n/a | Risk factors were investigated by forward stepwise logistic regression and only statistically significant (a two-sided P value <0.05) risk factors were retained.                                                                                                                                                                                                                                                                                                                        | No  |
| 9 | Wu, 2016 (derivation)                                                       | Logistic | NI  | Pre-selection | n/a | Stepwise logistic regression model. Variables with a p value less than 0.1 were kept in the final model.                                                                                                                                                                                                                                                                                                                                                                                 | No  |
| 9 | Wu, 2016 (validation)                                                       | n/a      | n/a | n/a           | n/a | n/a                                                                                                                                                                                                                                                                                                                                                                                                                                                                                      | n/a |

n/a: not applicable; NI: no information

**S3.6 Table: Model performance**

|    |                                                                 | Model Performance                                                                                                                     |                                                                                                       |                                                                                                 |                    |                                                     |
|----|-----------------------------------------------------------------|---------------------------------------------------------------------------------------------------------------------------------------|-------------------------------------------------------------------------------------------------------|-------------------------------------------------------------------------------------------------|--------------------|-----------------------------------------------------|
| N° | Study                                                           | Calibration                                                                                                                           | Discrimination (%)                                                                                    | Classification measures                                                                         | Cut-off point      | For replicati on studies, was the cut-off the same? |
| 1  | Asgari, 2020 European Risk Assessment tool (6-years validation) | Hosmer-Lemeshow X2 test (for intercept adjusted model): 13.53 with a p-value 0.09 (for male) and 10.1 with a p-value 0.26 (for women) | AUC (95% CI) for final intercept adjusted model = Male: 0.76 (0.72-0.79) and Female: 0.71 (0.69-0.73) | Men: Sensitivity = 72.7%, Specificity = 67.6%. Women: Sensitivity = 66.8%, Specificity = 65.6%. | Men: 25. Women: 19 | No                                                  |
| 1  | Asgari, 2020 European Risk Assessment tool (9-years validation) | Hosmer-Lemeshow X2 test (for intercept adjusted model): 12.54 with a p-value 0.13 (for male) and 8.19 with a p-value 0.41 (for women) | AUC (95% CI) for final intercept adjusted model = Male: 0.71 (0.67-0.74) and Female: 0.70 (0.68-0.73) | Men: Sensitivity = 64.5%, Specificity = 69.5%. Women: Sensitivity = 56.9%, Specificity = 76.6%  | Men: 25. Women: 23 | No                                                  |
| 2  | Bradshaw, 2019 - Model 1 (derivation)                           | Calibration slope: 0.96                                                                                                               | C-statistic (95% CI) = 0.79 (0.78-0.81)                                                               | Sensitivity = 72%, Specificity = 72%, PPV = 24%, NPV = 96%                                      | 0.09               | n/a                                                 |
| 2  | Bradshaw, 2019 - Model 2 (derivation)                           | Calibration slope: 0.98                                                                                                               | C-statistic (95% CI) = 0.73 (0.72-0.75)                                                               | Sensitivity = 68%, Specificity = 67%, PPV = 20%, NPV = 95%                                      | 0.09               | n/a                                                 |
| 2  | Bradshaw, 2019 - Model 3a (derivation)                          | Calibration slope: 0.98                                                                                                               | C-statistic (95% CI) = 0.77 (0.75-0.79)                                                               | Sensitivity = 71%, Specificity = 70%, PPV = 22%, NPV = 95%                                      | 0.09               | n/a                                                 |
| 2  | Bradshaw, 2019 - Model 3b (derivation)                          | Calibration slope: 0.99                                                                                                               | C-statistic (95% CI) = 0.77 (0.76-0.79)                                                               | Sensitivity = 71%, Specificity = 70%, PPV = 22%, NPV = 95%                                      | 0.09               | n/a                                                 |

|   |                                                              |                                                                                           |                                            |                                                                                            |      |     |
|---|--------------------------------------------------------------|-------------------------------------------------------------------------------------------|--------------------------------------------|--------------------------------------------------------------------------------------------|------|-----|
| 2 | Bradshaw, 2019 - Model 3a (CARRS-I urban validation)         | NI                                                                                        | C-statistic (95% CI) = 0.74 (0.73-0.74)    | NI                                                                                         | 0.09 | Yes |
| 2 | Bradshaw, 2019 - Model 3a (UDAY rural validation)            | NI                                                                                        | C-statistic (95% CI) = 0.70 (0.69-0.71)    | NI                                                                                         | 0.09 | Yes |
| 3 | Carrillo-Larco, 2017 - CRONICAS-CKD (derivation complete)    | Hosmer-Lemeshow X2 test: 4.13 with a p-value of 0.53 (for final multivariable model).     | AUC = 76.2%                                | Sensitivity = 82.5%, Specificity = 70.0%, PPV = 8.8%, NPV = 99.1%, LHR+ = 2.8, LHR- = 0.3  | 2    | n/a |
| 3 | Carrillo-Larco, 2017 - CRONICAS-CKD (derivation lab-free)    | Hosmer-Lemeshow X2 test: 4.13 with a p-value of 0.53 (for final multivariable model).     | AUC = 76%                                  | Sensitivity = 80.0%, Specificity = 72.0%, PPV = 9.1%, NPV = 99.0%, LHR+ = 2.9, LHR- = 0.3  | 2    | n/a |
| 3 | Carrillo-Larco, 2017 - CRONICAS-CKD (validation complete)    | NI                                                                                        | AUC = 70.0%.                               | Sensitivity = 70.5%, Specificity = 69.1%, PPV = 11.4%, NPV = 97.6%, LHR+ = 2.3, LHR- = 0.4 | 2    | Yes |
| 3 | Carrillo-Larco, 2017 - CRONICAS-CKD (validation lab-free)    | NI                                                                                        | AUC = 70.0%.                               | Sensitivity = 70.5%, Specificity = 69.7%, PPV = 11.6%, NPV = 97.7%, LHR+ = 2.3, LHR- = 0.4 | 2    | Yes |
| 4 | Mogueo, 2015 - Korean model (eGFR validation)                | Expected/Observed rate (95%) = 0.76 (0.67-0.86); Brier score = 0.164; Yates slope = 0.208 | C-statistic (95% CI) = 0.797 (0.765-0.829) | Sensitivity = 82%, Specificity = 67%                                                       | 0.30 | NI  |
| 4 | Mogueo, 2015 - Thai model (eGFR validation)                  | Expected/Observed rate (95%) = 0.98 (0.87-1.10); Brier score = 0.165; Yates slope = 0.200 | C-statistic (95% CI) = 0.760 (0.726-0.793) | Sensitivity = 73%, Specificity = 72%                                                       | 0.31 | NI  |
| 4 | Mogueo, 2015 - Korean model (eGFR or proteinuria validation) | Expected/Observed rate (95%) = 0.76 (0.67-0.85); Brier score = 0.161; Yates slope = 0.225 | C-statistic (95% CI) = 0.811 (0.780-0.842) | Sensitivity = 84%, Specificity = 68%                                                       | 0.31 | NI  |

|   |                                                                             |                                                                                                                 |                                            |                                      |      |     |
|---|-----------------------------------------------------------------------------|-----------------------------------------------------------------------------------------------------------------|--------------------------------------------|--------------------------------------|------|-----|
| 4 | Mogueo, 2015 - Thai model (eGFR or proteinuria validation)                  | Expected/Observed rate (95%) = 0.97 (0.86-1.09); Brier score = 0.164; Yates slope = 0.211                       | C-statistic (95% CI) = 0.772 (0.739-0.805) | Sensitivity = 74%, Specificity = 73% | 0.32 | NI  |
| 5 | Saranburut, 2017 - Framingham Heart Study (MDRD validation)                 | Hosmer-Lemeshow X2 test: 30.2 (p<0.001)                                                                         | AUC (95% CI) = 0.69 (0.66-0.73)            | NI                                   | NI   | NI  |
| 5 | Saranburut, 2017 - Framingham Heart Study (CKD-EPI validation)              | Hosmer-Lemeshow X2 test: 256.5 (p<0.001)                                                                        | AUC (95% CI) = 0.63 (0.57-0.65)            | NI                                   | NI   | NI  |
| 6 | Saranburut, 2017 - Model 1 (derivation Clinical only)                       | Hosmer-Lemeshow X2 test: 9.02 (p=0.34)                                                                          | AUC (95% CI) = 0.72 (0.69-0.75)            | NI                                   | NI   | n/a |
| 6 | Saranburut, 2017 - Model 1 BMI (derivation Clinical only)                   | Hosmer-Lemeshow X2 test: 8.87 (p=0.35)                                                                          | AUC (95% CI) = 0.72 (0.69-0.75)            | NI                                   | NI   | n/a |
| 6 | Saranburut, 2017 - Model 2 (derivation Clinical + Limited laboratory tests) | Hosmer-Lemeshow X2 test: 10.87 (p=0.21)                                                                         | AUC (95% CI) = 0.79 (0.76-0.82)            | NI                                   | NI   | n/a |
| 6 | Saranburut, 2017 - Model 3 (derivation Clinical + Full laboratory tests)    | Hosmer-Lemeshow X2 test: 8.28 (p=0.41)                                                                          | AUC (95% CI) = 0.80 (0.77-0.82)            | NI                                   | NI   | n/a |
| 6 | Saranburut, 2017 - Model 1 (validation Clinical only)                       | Hosmer-Lemeshow X2 test: 4.31 (p=0.229)                                                                         | AUC (95% CI) = 0.66 (0.55-0.78)            | NI                                   | NI   | NI  |
| 6 | Saranburut, 2017 - Model 2 (validation Clinical + Limited laboratory tests) | Hosmer-Lemeshow X2 test: 2.29 (p=0.514)                                                                         | AUC (95% CI) = 0.88 (0.80-0.95)            | NI                                   | NI   | NI  |
| 7 | Thakkinstian, 2011 (derivation)                                             | Calibration was assessed by subtracting the two Somer's D correlation coefficients: 0.045 (95% CI: 0.034-0.057) | C-statistic of internal validation = 0.741 | Sensitivity = 76%, Specificity = 69% | 5    | n/a |

|   |                                              |                                                              |                                                           |                                                                                                |    |     |
|---|----------------------------------------------|--------------------------------------------------------------|-----------------------------------------------------------|------------------------------------------------------------------------------------------------|----|-----|
| 8 | Wen, 2020 - Simple Risk Score (derivation)   | Hosmer-Lemeshow X2 test: 4.89 (p=0.769)                      | AUC (95% CI) = 0.717 (0.689-0.744)                        | Sensitivity = 70.49%, Specificity = 65.14%, PPV = 29.8%, NPV = 91.3%, LHR+ = 2.02, LHR- = 0.45 | 14 | n/a |
| 8 | Wen, 2020 - Best-fit Risk Score (derivation) | Hosmer-Lemeshow X2 test: 2.52 (p=0.961)                      | AUC (95% CI) = 0.721 (0.693-0.748)                        | Sensitivity = 56.83%, Specificity = 76.61%, PPV = 33.8%, NPV = 89.4%, LHR+ = 2.43, LHR- = 0.56 | 24 | n/a |
| 9 | Wu, 2016 (derivation)                        | Internal validation dataset: Hosmer-Lemeshow X2 test P=0.798 | AUC (95% CI) of internal validation = 0.894 (0.861-0.926) | Sensitivity = 0.820, Specificity = 0.863                                                       | 36 | n/a |
| 9 | Wu, 2016 (validation)                        | Hosmer-Lemeshow X2 test P=397                                | AUC = 0.880 (95%CI: 0.829-0.931)                          | NI                                                                                             | NI | NI  |

AUC, area under the curve; CI, confident interval; NI, no information.

**S3.7 Table: Results**

|    |                                                                 | Results                           |                                                          |                                  |                                              |
|----|-----------------------------------------------------------------|-----------------------------------|----------------------------------------------------------|----------------------------------|----------------------------------------------|
| N° | Study                                                           | Was a simplified model presented? | Were the coefficients of the regression model presented? | Was the baseline risk presented? | Were there alternative results presentation? |
| 1  | Asgari, 2020 European Risk Assessment tool (6-years validation) | No                                | No                                                       | Yes                              | No                                           |
| 1  | Asgari, 2020 European Risk Assessment tool (9-years validation) | No                                | No                                                       | Yes                              | No                                           |
| 2  | Bradshaw, 2019 - Model 1 (derivation)                           | Yes                               | No                                                       | No                               | No                                           |
| 2  | Bradshaw, 2019 - Model 2 (derivation)                           | Yes                               | No                                                       | No                               | No                                           |
| 2  | Bradshaw, 2019 - Model 3a (derivation)                          | No                                | No                                                       | No                               | No                                           |
| 2  | Bradshaw, 2019 - Model 3b (derivation)                          | Yes                               | No                                                       | No                               | No                                           |
| 2  | Bradshaw, 2019 - Model 3a (CARRS-I urban validation)            | No                                | No                                                       | No                               | No                                           |
| 2  | Bradshaw, 2019 - Model 3a (UDAY rural validation)               | No                                | No                                                       | No                               | No                                           |
| 3  | Carrillo-Larco, 2017 - CRONICAS-CKD (derivation complete)       | Yes                               | Yes                                                      | No                               | No                                           |
| 3  | Carrillo-Larco, 2017 - CRONICAS-CKD (derivation lab-free)       | No                                | Yes                                                      | No                               | No                                           |
| 3  | Carrillo-Larco, 2017 - CRONICAS-CKD (validation complete)       | Yes                               | No                                                       | No                               | No                                           |
| 3  | Carrillo-Larco, 2017 - CRONICAS-CKD (validation lab-free)       | No                                | No                                                       | No                               | No                                           |
| 4  | Mogueo, 2015 - Korean model (eGFR validation)                   | No                                | No                                                       | No                               | No                                           |
| 4  | Mogueo, 2015 - Thai model (eGFR validation)                     | No                                | No                                                       | No                               | No                                           |
| 4  | Mogueo, 2015 - Korean model (eGFR or proteinuria validation)    | No                                | No                                                       | No                               | No                                           |
| 4  | Mogueo, 2015 - Thai model (eGFR or proteinuria validation)      | No                                | No                                                       | No                               | No                                           |
| 5  | Saranburut, 2017 - Framingham Heart                             | No                                | Yes                                                      | No                               | No                                           |

|   | Study (MDRD validation)                                                     |     |     |     |     |
|---|-----------------------------------------------------------------------------|-----|-----|-----|-----|
| 5 | Saranburut, 2017 - Framingham Heart Study (CKD-EPI validation)              | No  | Yes | No  | No  |
| 6 | Saranburut, 2017 - Model 1 (derivation Clinical only)                       | No  | Yes | No  | Yes |
| 6 | Saranburut, 2017 - Model 1 BMI (derivation Clinical only)                   | No  | No  | No  | Yes |
| 6 | Saranburut, 2017 - Model 2 (derivation Clinical + Limited laboratory tests) | Yes | Yes | No  | Yes |
| 6 | Saranburut, 2017 - Model 3 (derivation Clinical + Full laboratory tests)    | Yes | Yes | No  | No  |
| 6 | Saranburut, 2017 - Model 1 (validation Clinical only)                       | No  | No  | No  | Yes |
| 6 | Saranburut, 2017 - Model 2 (validation Clinical + Limited laboratory tests) | Yes | No  | No  | Yes |
| 7 | Thakkinstian, 2011 (derivation)                                             | No  | Yes | No  | Yes |
| 8 | Wen, 2020 - Simple Risk Score (derivation)                                  | No  | Yes | Yes | Yes |
| 8 | Wen, 2020 - Best-fit Risk Score (derivation)                                | No  | Yes | Yes | Yes |
| 9 | Wu, 2016 (derivation)                                                       | No  | Yes | No  | Yes |
| 9 | Wu, 2016 (validation)                                                       | No  | Yes | No  | Yes |



**S3.8 Table: Discussion**

|    |                                                                             | Discussion                    |                                      |                      |
|----|-----------------------------------------------------------------------------|-------------------------------|--------------------------------------|----------------------|
| N° | Study                                                                       | Interpretation of the results | Comparison with other studies in LAC | Generalizability     |
| 1  | Asgari, 2020 European Risk Assessment tool (6-years validation)             | Exploratory                   | No                                   | Non-generalizability |
| 1  | Asgari, 2020 European Risk Assessment tool (9-years validation)             | Exploratory                   | No                                   | Non-generalizability |
| 2  | Bradshaw, 2019 - Model 1 (derivation)                                       | NI                            | No                                   | NI                   |
| 2  | Bradshaw, 2019 - Model 2 (derivation)                                       | NI                            | No                                   | NI                   |
| 2  | Bradshaw, 2019 - Model 3a (derivation)                                      | Confirmatory                  | Yes                                  | Non-generalizability |
| 2  | Bradshaw, 2019 - Model 3b (derivation)                                      | NI                            | No                                   | NI                   |
| 2  | Bradshaw, 2019 - Model 3a (CARRS-I urban validation)                        | Confirmatory                  | Yes                                  | Non-generalizability |
| 2  | Bradshaw, 2019 - Model 3a (UDAY rural validation)                           | Confirmatory                  | Yes                                  | Non-generalizability |
| 3  | Carrillo-Larco, 2017 - CRONICAS-CKD (derivation complete)                   | Exploratory                   | Yes                                  | Generalizable        |
| 3  | Carrillo-Larco, 2017 - CRONICAS-CKD (derivation lab-free)                   | Exploratory                   | Yes                                  | Generalizable        |
| 3  | Carrillo-Larco, 2017 - CRONICAS-CKD (validation complete)                   | Exploratory                   | Yes                                  | Generalizable        |
| 3  | Carrillo-Larco, 2017 - CRONICAS-CKD (validation lab-free)                   | Exploratory                   | Yes                                  | Generalizable        |
| 4  | Mogueo, 2015 - Korean model (eGFR validation)                               | Exploratory                   | Yes                                  | Non-generalizability |
| 4  | Mogueo, 2015 - Thai model (eGFR validation)                                 | Exploratory                   | Yes                                  | Non-generalizability |
| 4  | Mogueo, 2015 - Korean model (eGFR or proteinuria validation)                | Exploratory                   | Yes                                  | Non-generalizability |
| 4  | Mogueo, 2015 - Thai model (eGFR or proteinuria validation)                  | Exploratory                   | Yes                                  | Non-generalizability |
| 5  | Saranburut, 2017 - Framingham Heart Study (MDRD validation)                 | Exploratory                   | No                                   | Non-generalizability |
| 5  | Saranburut, 2017 - Framingham Heart Study (CKD-EPI validation)              | Exploratory                   | No                                   | Non-generalizability |
| 6  | Saranburut, 2017 - Model 1 (derivation Clinical only)                       | Exploratory                   | No                                   | Non-generalizability |
| 6  | Saranburut, 2017 - Model 1 BMI (derivation Clinical only)                   | Exploratory                   | No                                   | Non-generalizability |
| 6  | Saranburut, 2017 - Model 2 (derivation Clinical + Limited laboratory tests) | Exploratory                   | No                                   | Non-generalizability |
| 6  | Saranburut, 2017 - Model 3 (derivation Clinical + Full laboratory tests)    | Exploratory                   | No                                   | Non-generalizability |
| 6  | Saranburut, 2017 - Model 1 (validation Clinical only)                       | Exploratory                   | No                                   | Non-generalizability |
| 6  | Saranburut, 2017 - Model 2 (validation Clinical + Limited laboratory tests) | Exploratory                   | No                                   | Non-generalizability |
| 7  | Thakkinstian, 2011 (derivation)                                             | Confirmatory                  | No                                   | Non-generalizability |

|   |                                              |              |     |                      |
|---|----------------------------------------------|--------------|-----|----------------------|
| 8 | Wen, 2020 - Simple Risk Score (derivation)   | Confirmatory | Yes | Non-generalizability |
| 8 | Wen, 2020 - Best-fit Risk Score (derivation) | Exploratory  | Yes | Non-generalizability |
| 9 | Wu, 2016 (derivation)                        | Exploratory  | No  | Non-generalizability |
| 9 | Wu, 2016 (validation)                        | Exploratory  | No  | Non-generalizability |

**S4 Table: PROBAST****S4.1 Table: Risk of Bias (RoB)**

| Study                                                           | Participants                                                                              |                                                                 | Predictors                                                                  |                                                                    |                                                                            |
|-----------------------------------------------------------------|-------------------------------------------------------------------------------------------|-----------------------------------------------------------------|-----------------------------------------------------------------------------|--------------------------------------------------------------------|----------------------------------------------------------------------------|
|                                                                 | Were appropriate data sources used, e.g., cohort, RCT, or nested case-control study data? | Were all inclusions and exclusions of participants appropriate? | Were predictors defined and assessed in a similar way for all participants? | Were predictor assessments made without knowledge of outcome data? | Are all predictors available at the time the model is intended to be used? |
| Asgari, 2020 European Risk Assessment tool (6-years validation) | Y                                                                                         | Y                                                               | Y                                                                           | Y                                                                  | Y                                                                          |
| Asgari, 2020 European Risk Assessment tool (9-years validation) | Y                                                                                         | Y                                                               | Y                                                                           | Y                                                                  | Y                                                                          |
| Bradshaw, 2019 - Model 1 (derivation)                           | Y                                                                                         | Y                                                               | Y                                                                           | Y                                                                  | PY                                                                         |
| Bradshaw, 2019 - Model 2 (derivation)                           | Y                                                                                         | Y                                                               | Y                                                                           | Y                                                                  | Y                                                                          |
| Bradshaw, 2019 - Model 3a (derivation)                          | Y                                                                                         | Y                                                               | Y                                                                           | Y                                                                  | PY                                                                         |
| Bradshaw, 2019 - Model 3b (derivation)                          | Y                                                                                         | Y                                                               | Y                                                                           | Y                                                                  | PY                                                                         |
| Bradshaw, 2019 - Model 3a (CARRS-I urban validation)            | Y                                                                                         | Y                                                               | Y                                                                           | Y                                                                  | PY                                                                         |
| Bradshaw, 2019 - Model 3a (UDAY rural validation)               | Y                                                                                         | Y                                                               | Y                                                                           | Y                                                                  | PY                                                                         |
| Carrillo-Larco, 2017 - CRONICAS-CKD (derivation complete)       | Y                                                                                         | Y                                                               | Y                                                                           | Y                                                                  | PY                                                                         |
| Carrillo-Larco, 2017 - CRONICAS-CKD (derivation lab-free)       | Y                                                                                         | Y                                                               | Y                                                                           | Y                                                                  | Y                                                                          |
| Carrillo-Larco, 2017 - CRONICAS-CKD (validation complete)       | Y                                                                                         | Y                                                               | Y                                                                           | Y                                                                  | PY                                                                         |
| Carrillo-Larco, 2017 - CRONICAS-CKD (validation lab-free)       | Y                                                                                         | Y                                                               | Y                                                                           | Y                                                                  | Y                                                                          |
| Mogueo, 2015 - Korean model (eGFR validation)                   | Y                                                                                         | Y                                                               | Y                                                                           | Y                                                                  | PY                                                                         |
| Mogueo, 2015 - Thai model (eGFR validation)                     | Y                                                                                         | Y                                                               | Y                                                                           | Y                                                                  | Y                                                                          |
| Mogueo, 2015 - Korean model (eGFR or proteinuria validation)    | Y                                                                                         | Y                                                               | Y                                                                           | Y                                                                  | PY                                                                         |
| Mogueo, 2015 - Thai model (eGFR or proteinuria validation)      | Y                                                                                         | Y                                                               | Y                                                                           | Y                                                                  | Y                                                                          |

|                                                                             |   |   |   |   |    |
|-----------------------------------------------------------------------------|---|---|---|---|----|
| Saranburut, 2017 - Framingham Heart Study (MDRD validation)                 | Y | Y | Y | Y | PY |
| Saranburut, 2017 - Framingham Heart Study (CKD-EPI validation)              | Y | Y | Y | Y | PY |
| Saranburut, 2017 - Model 1 (derivation Clinical only)                       | Y | Y | Y | Y | Y  |
| Saranburut, 2017 - Model 1 BMI (derivation Clinical only)                   | Y | Y | Y | Y | Y  |
| Saranburut, 2017 - Model 2 (derivation Clinical + Limited laboratory tests) | Y | Y | Y | Y | PY |
| Saranburut, 2017 - Model 3 (derivation Clinical + Full laboratory tests)    | Y | Y | Y | Y | PY |
| Saranburut, 2017 - Model 1 (validation Clinical only)                       | Y | Y | Y | Y | Y  |
| Saranburut, 2017 - Model 2 (validation Clinical + Limited laboratory tests) | Y | Y | Y | Y | PY |
| Thakkestian, 2011 (derivation)                                              | Y | Y | Y | Y | Y  |
| Wen, 2020 - Simple Risk Score (derivation)                                  | Y | Y | Y | Y | Y  |
| Wen, 2020 - Best-fit Risk Score (derivation)                                | Y | Y | Y | Y | Y  |
| Wu, 2016 (derivation)                                                       | Y | Y | Y | Y | Y  |
| Wu, 2016 (validation)                                                       | Y | Y | Y | Y | Y  |

Answer options: Y (yes), PY (probably yes), N (no), PN (probably no), NI (no information), n/a (not applicable).

| Study                                                           | Outcome                                   |                                                         |                                                       |                                                                               |                                                                        |                                                                                           |
|-----------------------------------------------------------------|-------------------------------------------|---------------------------------------------------------|-------------------------------------------------------|-------------------------------------------------------------------------------|------------------------------------------------------------------------|-------------------------------------------------------------------------------------------|
|                                                                 | Was the outcome determined appropriately? | Was a prespecified or standard outcome definition used? | Were predictors excluded from the outcome definition? | Was the outcome defined and determined in a similar way for all participants? | Was the outcome determined without knowledge of predictor information? | Was the time interval between predictor assessment and outcome determination appropriate? |
| Asgari, 2020 European Risk Assessment tool (6-years validation) | Y                                         | Y                                                       | Y                                                     | Y                                                                             | NI                                                                     | Y                                                                                         |
| Asgari, 2020 European Risk Assessment tool (9-years validation) | Y                                         | Y                                                       | Y                                                     | Y                                                                             | NI                                                                     | Y                                                                                         |
| Bradshaw, 2019 - Model 1 (derivation)                           | Y                                         | Y                                                       | Y                                                     | Y                                                                             | NI                                                                     | PY                                                                                        |
| Bradshaw, 2019 - Model 2 (derivation)                           | Y                                         | Y                                                       | Y                                                     | Y                                                                             | NI                                                                     | Y                                                                                         |
| Bradshaw, 2019 - Model 3a (derivation)                          | NI                                        | Y                                                       | Y                                                     | Y                                                                             | NI                                                                     | PY                                                                                        |
| Bradshaw, 2019 - Model 3b (derivation)                          | Y                                         | Y                                                       | Y                                                     | Y                                                                             | NI                                                                     | PY                                                                                        |
| Bradshaw, 2019 - Model 3a (CARRS-I urban validation)            | Y                                         | Y                                                       | Y                                                     | Y                                                                             | NI                                                                     | PY                                                                                        |
| Bradshaw, 2019 - Model 3a (UDAY rural validation)               | Y                                         | Y                                                       | Y                                                     | Y                                                                             | NI                                                                     | PY                                                                                        |
| Carrillo-Larco, 2017 - CRONICAS-CKD (derivation complete)       | Y                                         | Y                                                       | Y                                                     | Y                                                                             | PY                                                                     | PY                                                                                        |
| Carrillo-Larco, 2017 - CRONICAS-CKD (derivation lab-free)       | Y                                         | Y                                                       | Y                                                     | Y                                                                             | PY                                                                     | Y                                                                                         |
| Carrillo-Larco, 2017 - CRONICAS-CKD (validation complete)       | Y                                         | Y                                                       | Y                                                     | Y                                                                             | PY                                                                     | PY                                                                                        |

|                                                                             |   |   |   |   |    |    |
|-----------------------------------------------------------------------------|---|---|---|---|----|----|
| Carrillo-Larco, 2017 - CRONICAS-CKD (validation lab-free)                   | Y | Y | Y | Y | PY | Y  |
| Mogueo, 2015 - Korean model (eGFR validation)                               | Y | Y | Y | Y | NI | PY |
| Mogueo, 2015 - Thai model (eGFR validation)                                 | Y | Y | Y | Y | NI | Y  |
| Mogueo, 2015 - Korean model (eGFR or proteinuria validation)                | Y | Y | Y | Y | NI | PY |
| Mogueo, 2015 - Thai model (eGFR or proteinuria validation)                  | Y | Y | Y | Y | NI | Y  |
| Saranburut, 2017 - Framingham Heart Study (MDRD validation)                 | Y | Y | Y | Y | NI | PY |
| Saranburut, 2017 - Framingham Heart Study (CKD-EPI validation)              | Y | Y | Y | Y | NI | PY |
| Saranburut, 2017 - Model 1 (derivation Clinical only)                       | Y | Y | Y | Y | NI | Y  |
| Saranburut, 2017 - Model 1 BMI (derivation Clinical only)                   | Y | Y | Y | Y | NI | Y  |
| Saranburut, 2017 - Model 2 (derivation Clinical + Limited laboratory tests) | Y | Y | Y | Y | NI | PY |
| Saranburut, 2017 - Model 3 (derivation Clinical + Full laboratory tests)    | Y | Y | Y | Y | NI | PY |
| Saranburut, 2017 - Model 1 (validation Clinical only)                       | Y | Y | Y | Y | NI | Y  |
| Saranburut, 2017 - Model 2 (validation Clinical + Limited laboratory tests) | Y | Y | Y | Y | NI | PY |
| Thakkinstian, 2011 (derivation)                                             | Y | Y | Y | Y | NI | Y  |
| Wen, 2020 - Simple Risk Score (derivation)                                  | Y | Y | Y | Y | NI | Y  |

|                                              |   |   |   |   |    |   |
|----------------------------------------------|---|---|---|---|----|---|
| Wen, 2020 - Best-fit Risk Score (derivation) | Y | Y | Y | Y | NI | Y |
| Wu, 2016 (derivation)                        | Y | Y | Y | Y | NI | Y |
| Wu, 2016 (validation)                        | Y | Y | Y | Y | NI | Y |

Answer options: Y (yes), PY (probably yes), N (no), PN (probably no), NI (no information), n/a (not applicable).

| Study                                                           | Analysis                                                         |                                                                   |                                                          |                                                            |                                                                                               |                                                                                                                                 |                                                                   |                                                                                                    |                                                                                                                                                            |
|-----------------------------------------------------------------|------------------------------------------------------------------|-------------------------------------------------------------------|----------------------------------------------------------|------------------------------------------------------------|-----------------------------------------------------------------------------------------------|---------------------------------------------------------------------------------------------------------------------------------|-------------------------------------------------------------------|----------------------------------------------------------------------------------------------------|------------------------------------------------------------------------------------------------------------------------------------------------------------|
|                                                                 | Were there a reasonable number of participants with the outcome? | Were continuous and categorical predictors handled appropriately? | Were all enrolled participants included in the analysis? | Were participants with missing data handled appropriately? | Was selection of predictors based on univariable analysis avoided? [development studies only] | Were complexities in the data (e.g., censoring, competing risks, sampling of control participants) accounted for appropriately? | Were relevant model performance measures evaluated appropriately? | Were model overfitting and optimism in model performance accounted for? [development studies only] | Do predictors and their assigned weights in the final model correspond to the results from the reported multivariable analysis? [development studies only] |
| Asgari, 2020 European Risk Assessment tool (6-years validation) | Y                                                                | Y                                                                 | N                                                        | N                                                          | n/a                                                                                           | NI                                                                                                                              | N                                                                 | n/a                                                                                                | n/a                                                                                                                                                        |
| Asgari, 2020 European Risk Assessment tool (9-years validation) | Y                                                                | Y                                                                 | N                                                        | N                                                          | n/a                                                                                           | NI                                                                                                                              | N                                                                 | n/a                                                                                                | n/a                                                                                                                                                        |
| Bradshaw, 2019 - Model 1 (derivation)                           | Y                                                                | N                                                                 | N                                                        | N                                                          | N                                                                                             | NI                                                                                                                              | Y                                                                 | Y                                                                                                  | NI                                                                                                                                                         |
| Bradshaw, 2019 - Model 2 (derivation)                           | Y                                                                | N                                                                 | N                                                        | N                                                          | N                                                                                             | NI                                                                                                                              | Y                                                                 | Y                                                                                                  | NI                                                                                                                                                         |
| Bradshaw, 2019 - Model 3a (derivation)                          | NI                                                               | NI                                                                | N                                                        | N                                                          | N                                                                                             | NI                                                                                                                              | Y                                                                 | Y                                                                                                  | NI                                                                                                                                                         |
| Bradshaw, 2019 - Model 3b (derivation)                          | Y                                                                | N                                                                 | N                                                        | N                                                          | N                                                                                             | NI                                                                                                                              | Y                                                                 | Y                                                                                                  | NI                                                                                                                                                         |
| Bradshaw, 2019 - Model 3a (CARRS-I urban validation)            | NI                                                               | Y                                                                 | N                                                        | N                                                          | n/a                                                                                           | NI                                                                                                                              | NI                                                                | n/a                                                                                                | n/a                                                                                                                                                        |



|                                                                |    |   |   |   |     |    |    |     |     |
|----------------------------------------------------------------|----|---|---|---|-----|----|----|-----|-----|
| Bradshaw, 2019 - Model 3a (UDAY rural validation)              | NI | Y | N | N | n/a | NI | NI | n/a | n/a |
| Carrillo-Larco, 2017 - CRONICAS-CKD (derivation complete)      | N  | N | N | N | N   | NI | N  | Y   | Y   |
| Carrillo-Larco, 2017 - CRONICAS-CKD (derivation lab-free)      | N  | N | N | N | N   | NI | N  | Y   | Y   |
| Carrillo-Larco, 2017 - CRONICAS-CKD (validation complete)      | N  | Y | N | N | n/a | NI | N  | n/a | n/a |
| Carrillo-Larco, 2017 - CRONICAS-CKD (validation lab-free)      | N  | Y | N | N | n/a | NI | N  | n/a | n/a |
| Mogueo, 2015 - Korean model (eGFR validation)                  | Y  | Y | N | N | n/a | NI | PY | n/a | n/a |
| Mogueo, 2015 - Thai model (eGFR validation)                    | Y  | Y | N | N | n/a | NI | PY | n/a | n/a |
| Mogueo, 2015 - Korean model (eGFR or proteinuria validation)   | Y  | Y | N | N | n/a | NI | PY | n/a | n/a |
| Mogueo, 2015 - Thai model (eGFR or proteinuria validation)     | Y  | Y | N | N | n/a | NI | PY | n/a | n/a |
| Saranburut, 2017 - Framingham Heart Study (MDRD validation)    | Y  | Y | N | N | n/a | NI | N  | n/a | n/a |
| Saranburut, 2017 - Framingham Heart Study (CKD-EPI validation) | Y  | Y | N | N | n/a | NI | N  | n/a | n/a |
| Saranburut, 2017 - Model 1 (derivation Clinical only)          | PY | N | N | N | N   | NI | N  | Y   | Y   |
| Saranburut, 2017 - Model 1 BMI (derivation Clinical only)      | PY | N | N | N | N   | NI | N  | Y   | NI  |

|                                                                             |    |   |    |    |     |    |   |     |     |
|-----------------------------------------------------------------------------|----|---|----|----|-----|----|---|-----|-----|
| Saranburut, 2017 - Model 2 (derivation Clinical + Limited laboratory tests) | PY | N | N  | N  | N   | NI | N | Y   | Y   |
| Saranburut, 2017 - Model 3 (derivation Clinical + Full laboratory tests)    | PN | N | N  | N  | N   | NI | N | Y   | Y   |
| Saranburut, 2017 - Model 1 (validation Clinical only)                       | N  | Y | N  | N  | n/a | NI | N | n/a | n/a |
| Saranburut, 2017 - Model 2 (validation Clinical + Limited laboratory tests) | N  | Y | N  | N  | n/a | NI | N | n/a | n/a |
| Thakkestian, 2011 (derivation)                                              | PY | N | NI | NI | N   | NI | N | Y   | Y   |
| Wen, 2020 - Simple Risk Score (derivation)                                  | NI | N | N  | N  | N   | NI | N | N   | Y   |
| Wen, 2020 - Best-fit Risk Score (derivation)                                | NI | N | N  | N  | N   | NI | N | N   | Y   |
| Wu, 2016 (derivation)                                                       | NI | N | N  | N  | N   | NI | N | N   | Y   |
| Wu, 2016 (validation)                                                       | N  | Y | N  | N  | n/a | NI | N | n/a | Y   |

Answer options: Y (yes), PY (probably yes), N (no), PN (probably no), NI (no information), n/a (not applicable).

**S4.2 Table: Applicability**

| N° | Study                                                                       | Participants | Predictors | Outcome |
|----|-----------------------------------------------------------------------------|--------------|------------|---------|
| 1  | Asgari, 2020 European Risk Assessment tool (6-years validation)             | Low          | Low        | Low     |
| 1  | Asgari, 2020 European Risk Assessment tool (9-years validation)             | Low          | Low        | Low     |
| 2  | Bradshaw, 2019 - Model 1 (derivation)                                       | Low          | Low        | Low     |
| 2  | Bradshaw, 2019 - Model 2 (derivation)                                       | Low          | Low        | Low     |
| 2  | Bradshaw, 2019 - Model 3a (derivation)                                      | Low          | Low        | Low     |
| 2  | Bradshaw, 2019 - Model 3b (derivation)                                      | Low          | Low        | Low     |
| 2  | Bradshaw, 2019 - Model 3a (CARRS-I urban validation)                        | Low          | Low        | Low     |
| 2  | Bradshaw, 2019 - Model 3a (UDAY rural validation)                           | Low          | Low        | Low     |
| 3  | Carrillo-Larco, 2017 - CRONICAS-CKD (derivation complete)                   | Low          | Low        | Low     |
| 3  | Carrillo-Larco, 2017 - CRONICAS-CKD (derivation lab-free)                   | Low          | Low        | Low     |
| 3  | Carrillo-Larco, 2017 - CRONICAS-CKD (validation complete)                   | Low          | Low        | Low     |
| 3  | Carrillo-Larco, 2017 - CRONICAS-CKD (validation lab-free)                   | Low          | Low        | Low     |
| 4  | Mogueo, 2015 - Korean model (eGFR validation)                               | Low          | Low        | Low     |
| 4  | Mogueo, 2015 - Thai model (eGFR validation)                                 | Low          | Low        | Low     |
| 4  | Mogueo, 2015 - Korean model (eGFR or proteinuria validation)                | Low          | Low        | Low     |
| 4  | Mogueo, 2015 - Thai model (eGFR or proteinuria validation)                  | Low          | Low        | Low     |
| 5  | Saranburut, 2017 - Framingham Heart Study (MDRD validation)                 | Low          | Low        | Low     |
| 5  | Saranburut, 2017 - Framingham Heart Study (CKD-EPI validation)              | Low          | Low        | Low     |
| 6  | Saranburut, 2017 - Model 1 (derivation Clinical only)                       | Low          | Low        | Low     |
| 6  | Saranburut, 2017 - Model 1 BMI (derivation Clinical only)                   | Low          | Low        | Low     |
| 6  | Saranburut, 2017 - Model 2 (derivation Clinical + Limited laboratory tests) | Low          | Low        | Low     |
| 6  | Saranburut, 2017 - Model 3 (derivation Clinical + Full laboratory tests)    | Low          | Low        | Low     |
| 6  | Saranburut, 2017 - Model 1 (validation Clinical only)                       | Low          | Low        | Low     |
| 6  | Saranburut, 2017 - Model 2 (validation Clinical + Limited laboratory tests) | Low          | Low        | Low     |
| 7  | Thakkinstian, 2011 (derivation)                                             | Low          | Low        | Low     |
| 8  | Wen, 2020 - Simple Risk Score (derivation)                                  | Low          | Low        | Low     |
| 8  | Wen, 2020 - Best-fit Risk Score (derivation)                                | Low          | Low        | Low     |
| 9  | Wu, 2016 (derivation)                                                       | Low          | Low        | Low     |

|                                                                                                                                           |                       |     |     |     |
|-------------------------------------------------------------------------------------------------------------------------------------------|-----------------------|-----|-----|-----|
| 9                                                                                                                                         | Wu, 2016 (validation) | Low | Low | Low |
| Answer options: Low (low concern for applicability), Hig (High concern for applicability) and Unclear (Unclear concern for applicability) |                       |     |     |     |

**S1 Figure: Countries where studies were conducted.**

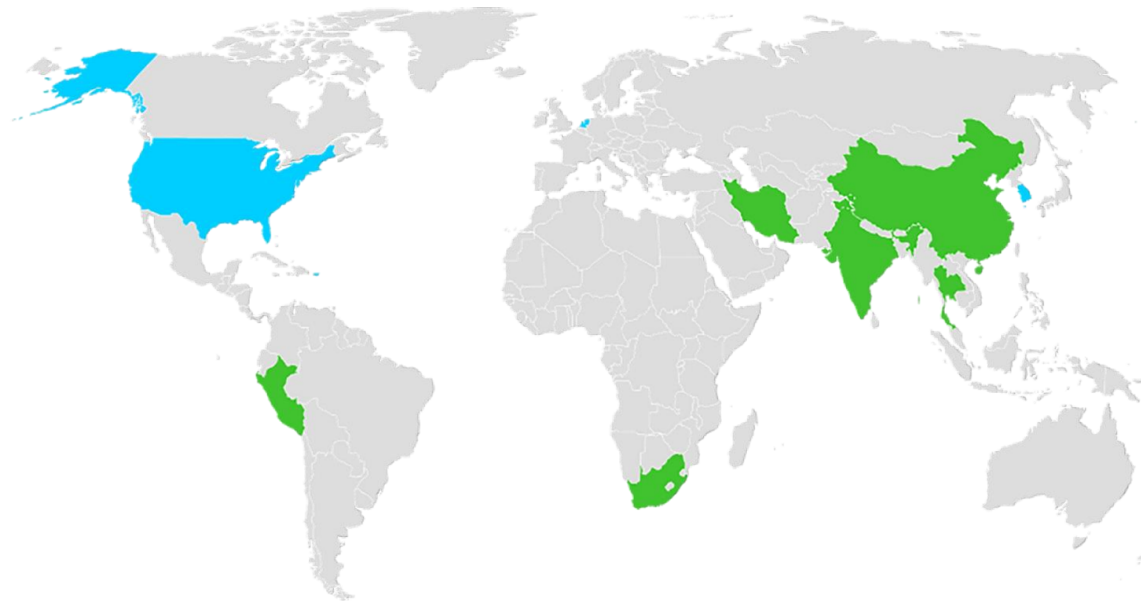

LMIC that developed and/or validated models included in this review (Green). Moreover, Asgari et al, Mogueo et al ] and Saranburut et al validated risk models that were originally derived in the Netherlands, South Korea and the United States, respectively (Blue).

**S2 Figure: Predictors included in the final models.**

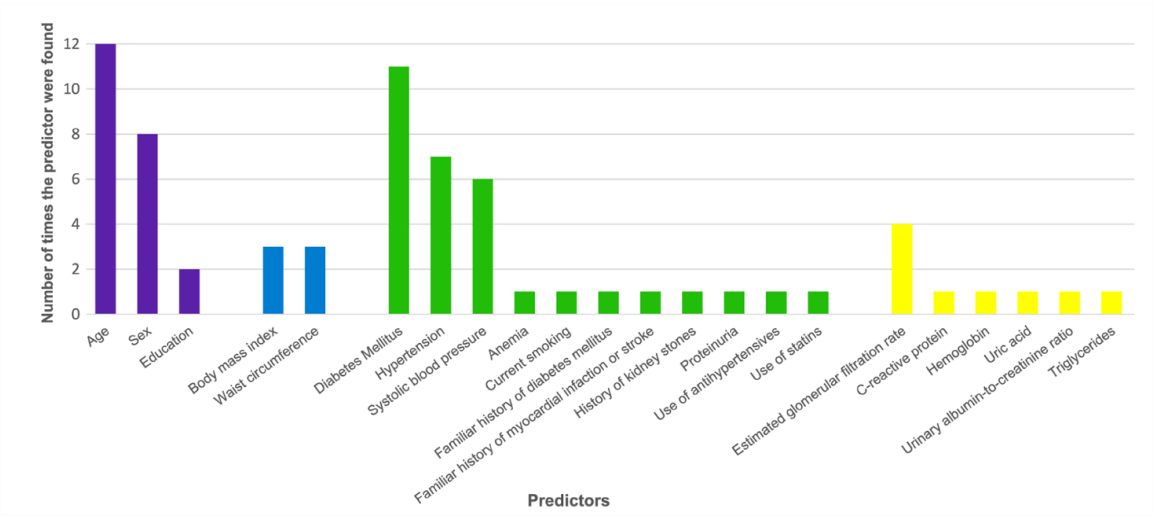

The colours of the bars identify the underlying characteristic of predictors inherent to: the subject (purple), anthropometrics (blue), clinical assessment and history (green), and laboratory measures (yellow).
